# Supplementary material for: Design, synthesis and cytotoxic evaluation of a library of oxadiazole-containing hybrids
Source: Royal Society of Chemistry journal article supplement (doi:10.1039/d1ra05602f), 2021-01-01
Supplement: d1ra05602f1.pdf [file d1ra05602f1.pdf]

Supporting Information

***Design, synthesis and cytotoxic evaluation of a library of oxadiazole-containing hybrids***

Cristián M. Camacho;<sup>a</sup> Marianela G. Pizzio;<sup>a</sup> David L. Roces;<sup>a</sup> Dora B. Boggián;<sup>a</sup> Ernesto G. Mata;<sup>a</sup> \* Yanina Bellizzi;<sup>b</sup> Elizabeth Barrionuevo;<sup>b</sup> Viviana C. Blank;<sup>b</sup> Leonor P. Roguin<sup>b</sup>

<sup>a</sup>Instituto de Química Rosario (CONICET – UNR), Facultad de Ciencias Bioquímicas y Farmacéuticas, UNR, Suipacha 531, 2000 Rosario.

<sup>b</sup>Instituto de Química y Fisicoquímica Biológicas (UBA – CONICET), Facultad de Farmacia y Bioquímica, UBA, Junín 956, C1113AAD Buenos Aires.

Table of Contents

|                                                                              |    |
|------------------------------------------------------------------------------|----|
| 1. NMR spectra .....                                                         | 2  |
| 2. Variable temperature <sup>1</sup> H NMR experiment on compound 13ca ..... | 34 |

---

\* To whom correspondence should be addressed. E-mail: [mata@iquir-conicet.gov.ar](mailto:mata@iquir-conicet.gov.ar) Tel: +54 341 4370477.

# 1. NMR spectra

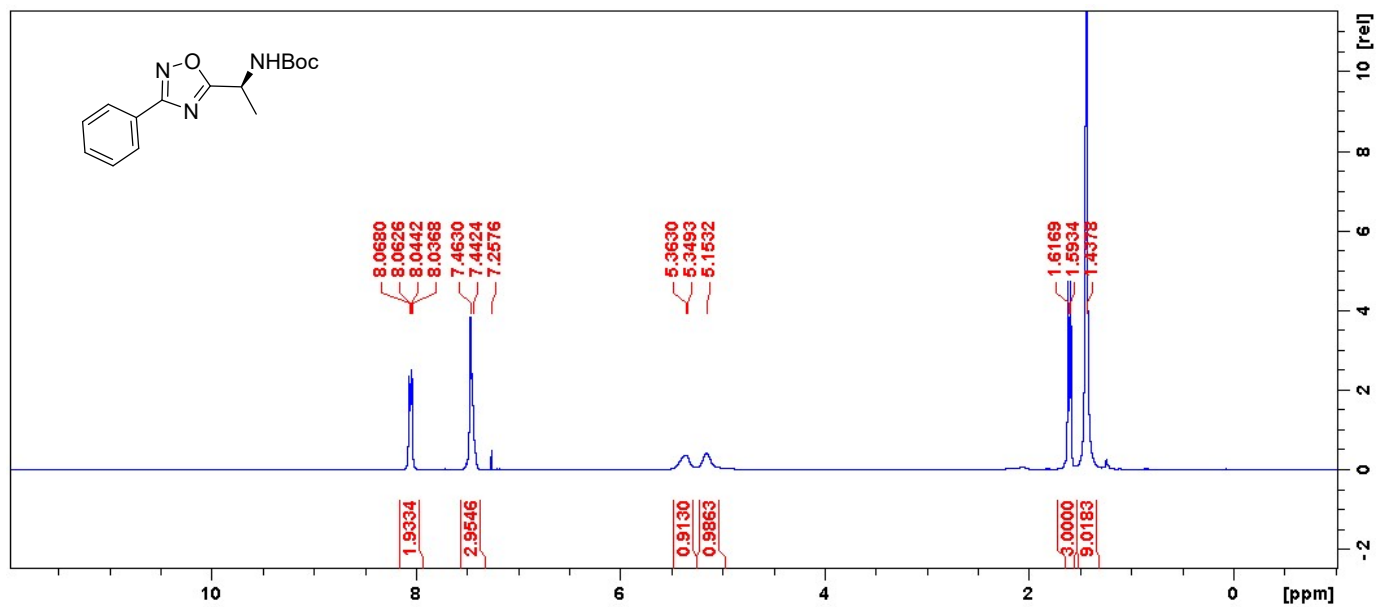

Figure S 1. <sup>1</sup>H NMR spectra of compound **13aa** in CDCl<sub>3</sub>.

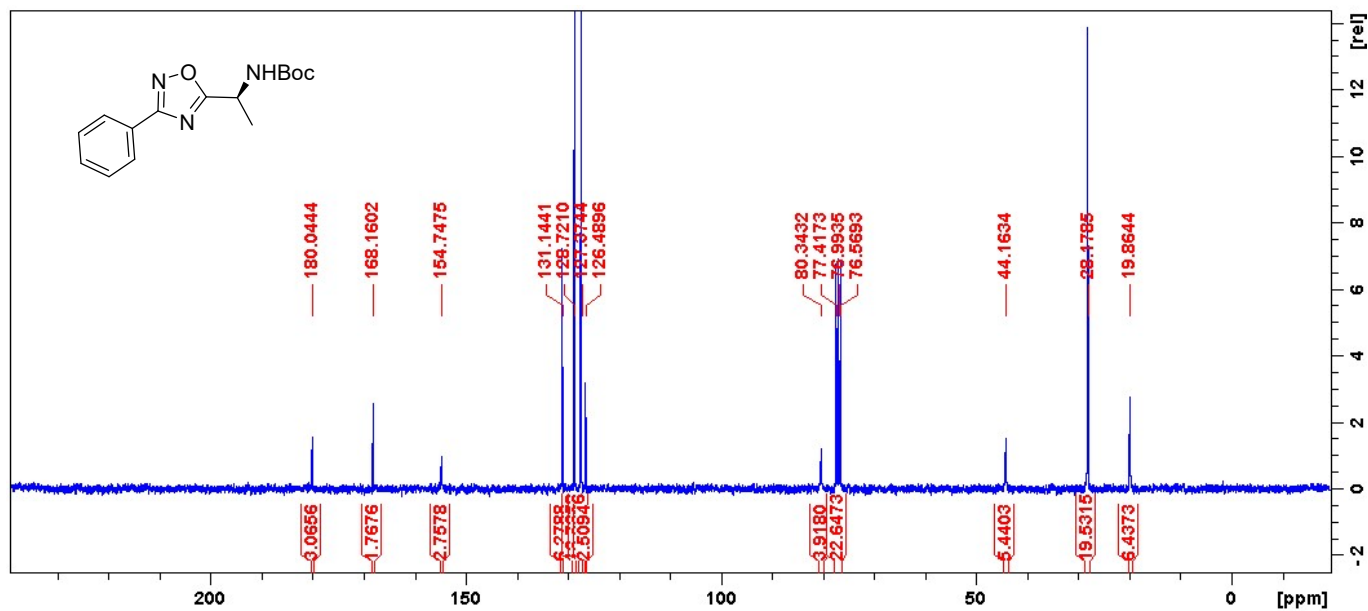

Figure S 1. <sup>13</sup>C NMR spectra of compound **13aa** in CDCl<sub>3</sub>.

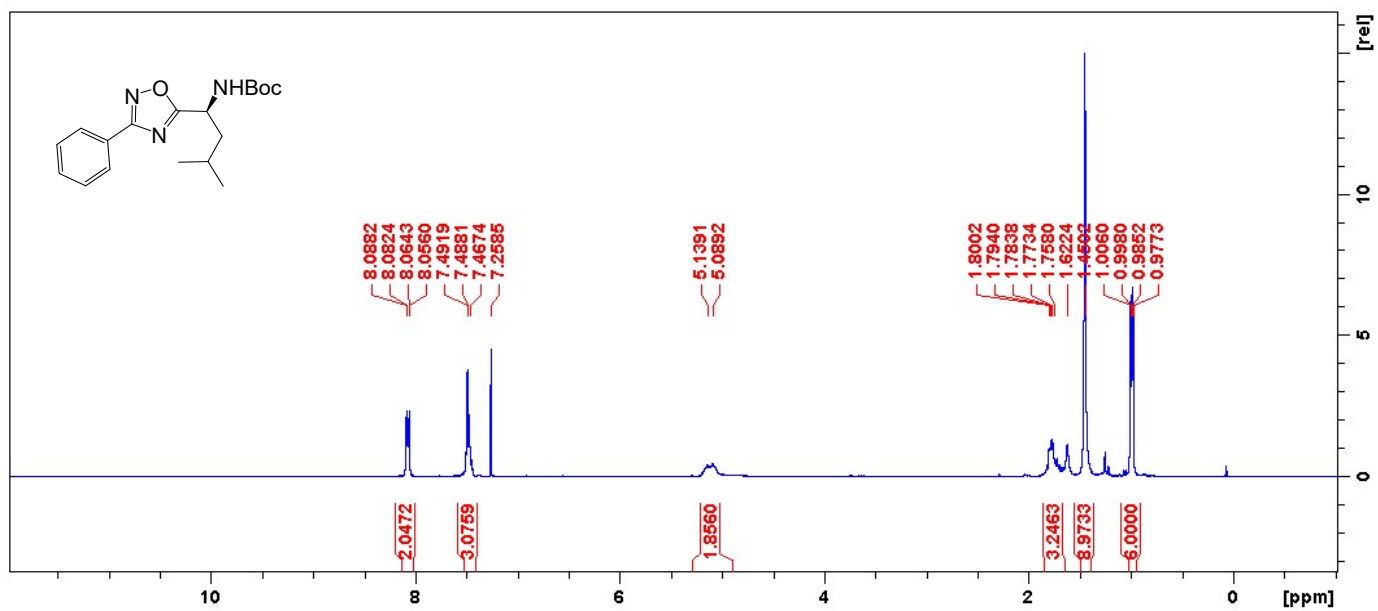

Figure S 2. <sup>1</sup>H NMR spectra of compound 13ba in CDCl<sub>3</sub>.

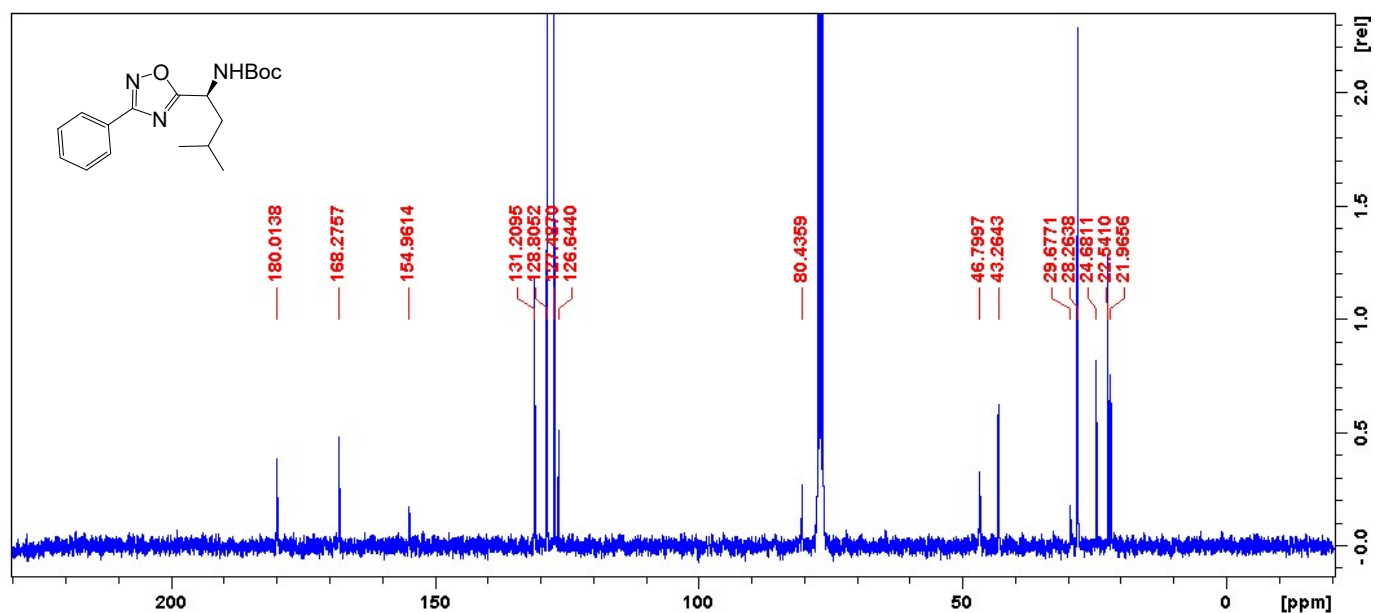

Figure S 2. <sup>13</sup>C NMR spectra of compound 13ba in CDCl<sub>3</sub>.

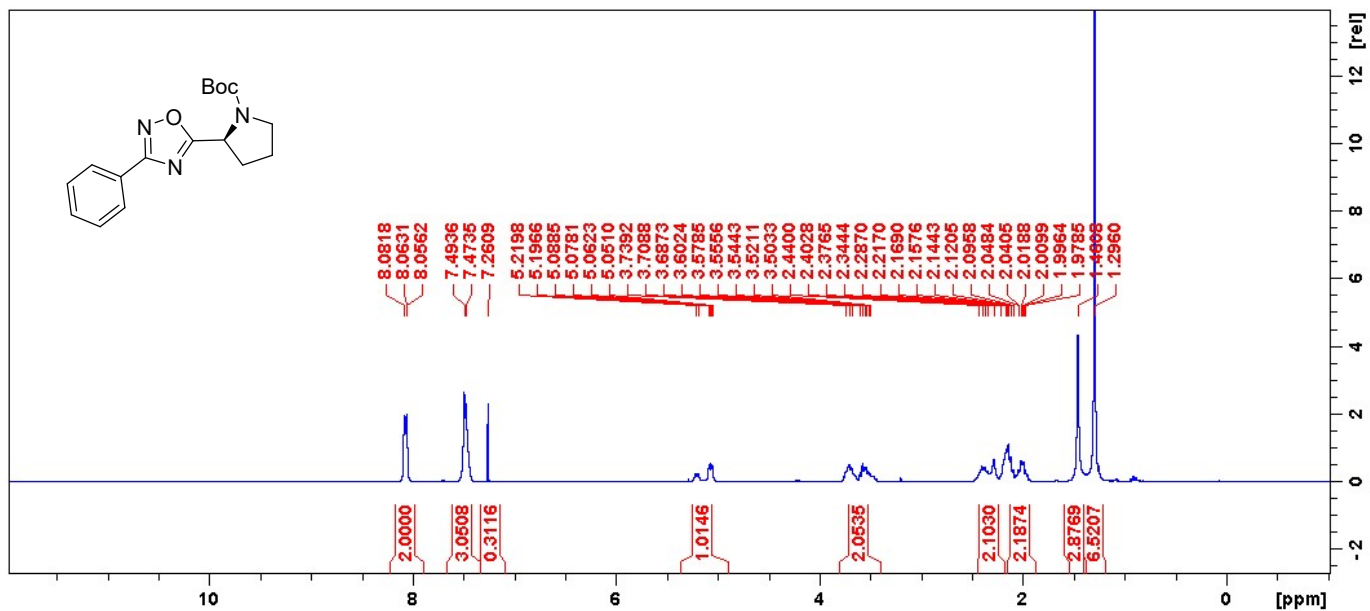

Figure S 3.  $^1\text{H}$  NMR spectra of compound 13ca in  $\text{CDCl}_3$ .

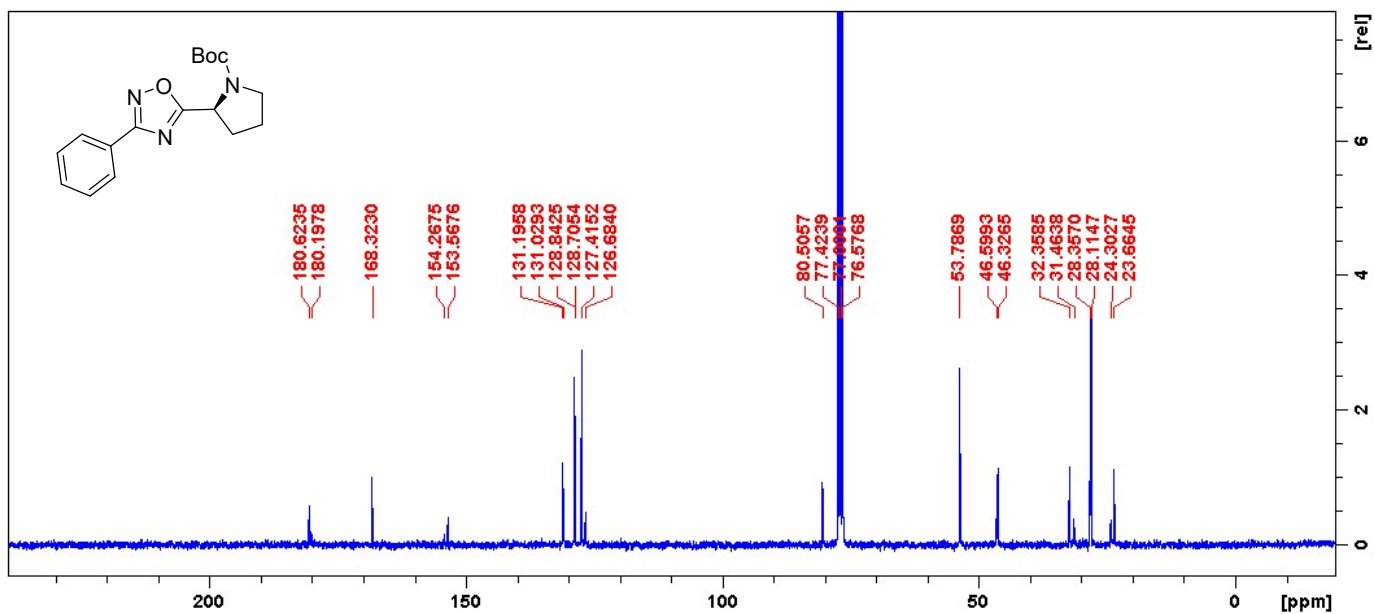

Figure S 3.  $^{13}\text{C}$  NMR spectra of compound 13ca in  $\text{CDCl}_3$ .

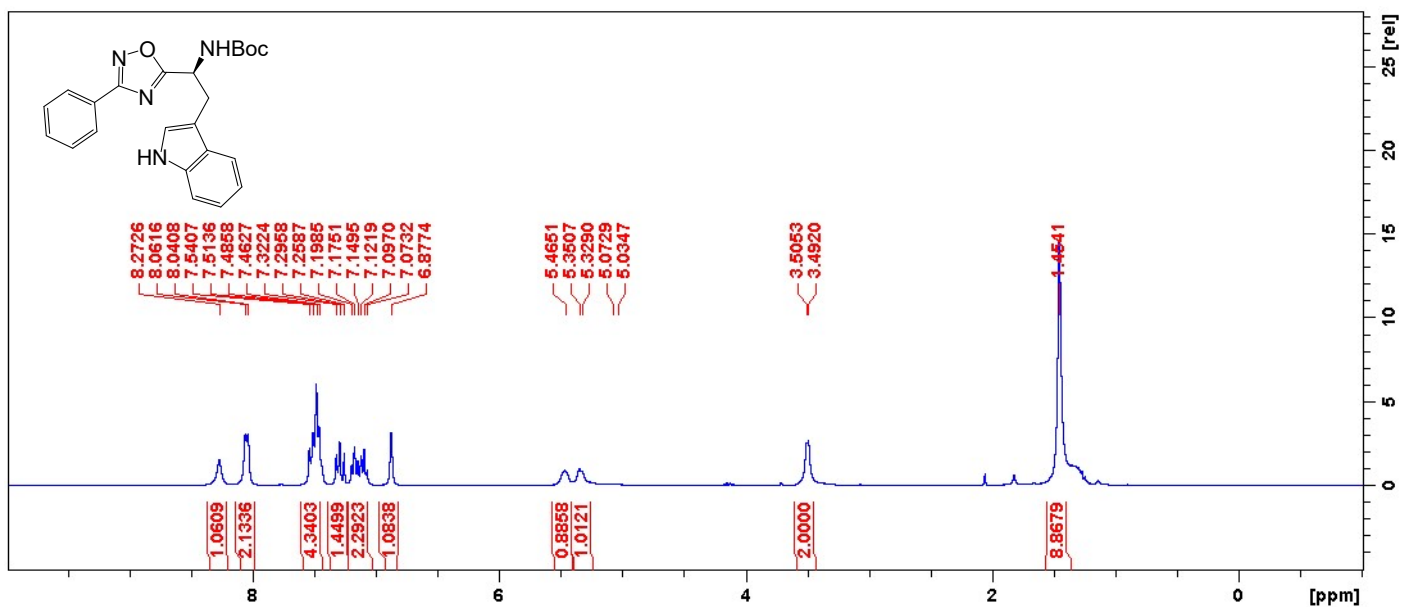

Figure S 4. <sup>1</sup>H NMR spectra of compound 13da in CDCl<sub>3</sub>.

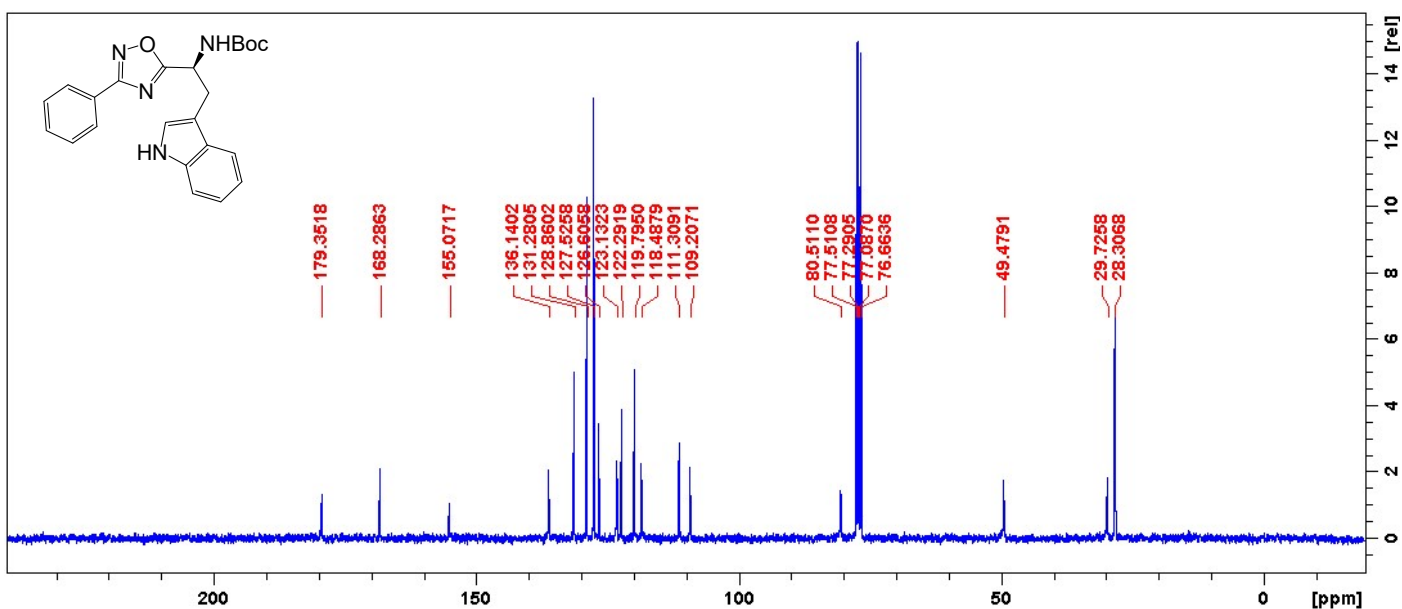

Figure S 4. <sup>13</sup>C NMR spectra of compound 13da in CDCl<sub>3</sub>.

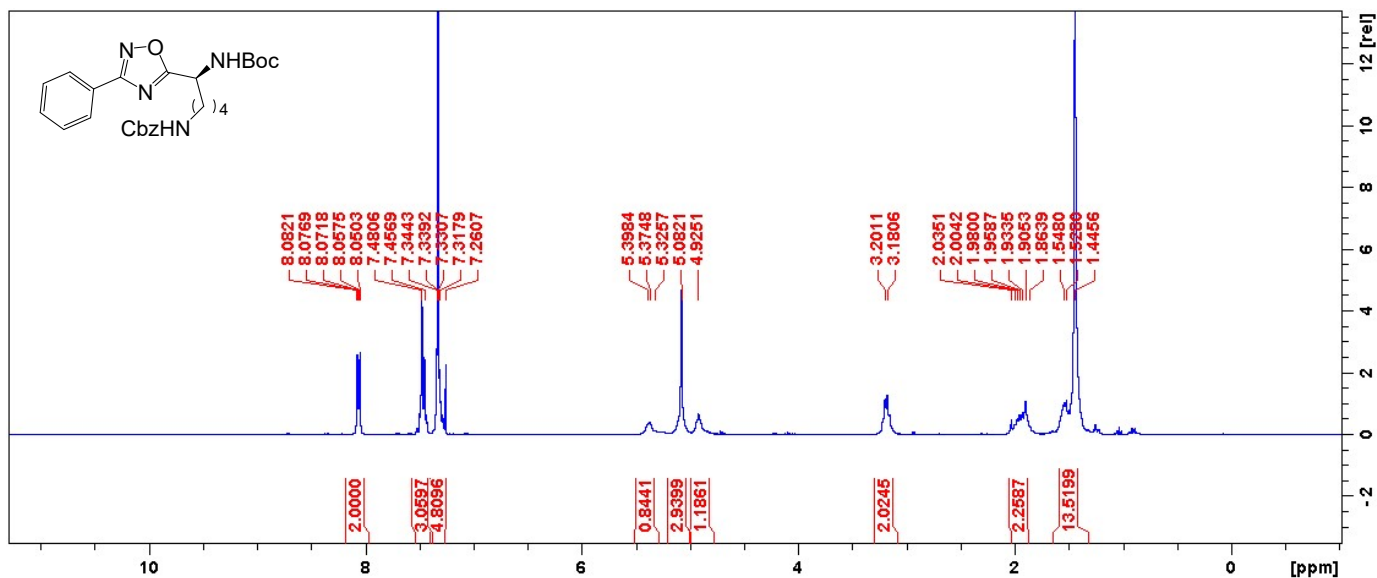

Figure S 5. <sup>1</sup>H NMR spectra of compound 13a in CDCl<sub>3</sub>.

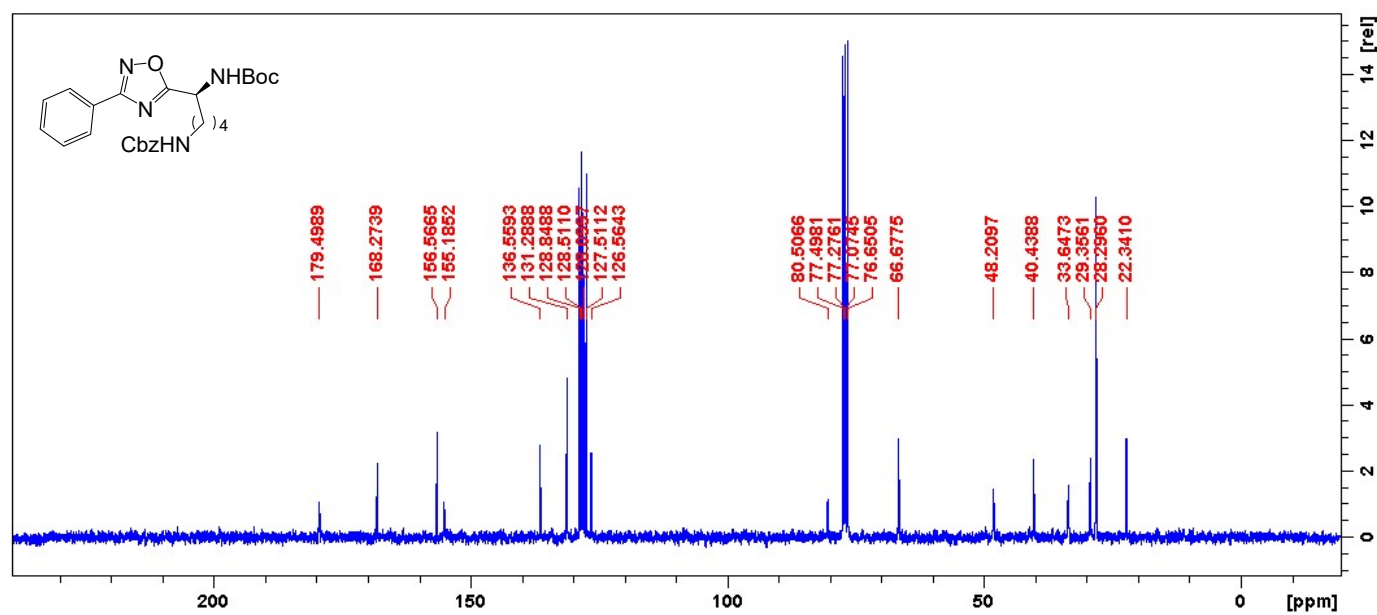

Figure S 5. <sup>13</sup>C NMR spectra of compound 13a in CDCl<sub>3</sub>.

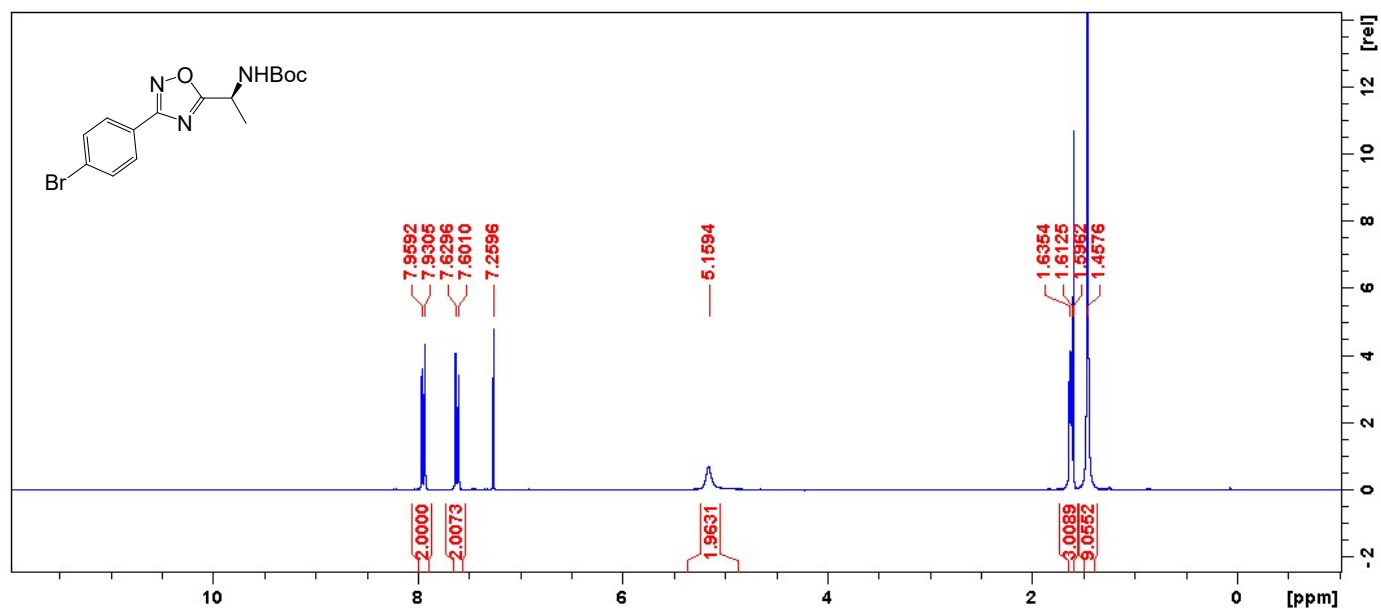

Figure S 6.  $^1\text{H}$  NMR spectra of compound 13ab in  $\text{CDCl}_3$ .

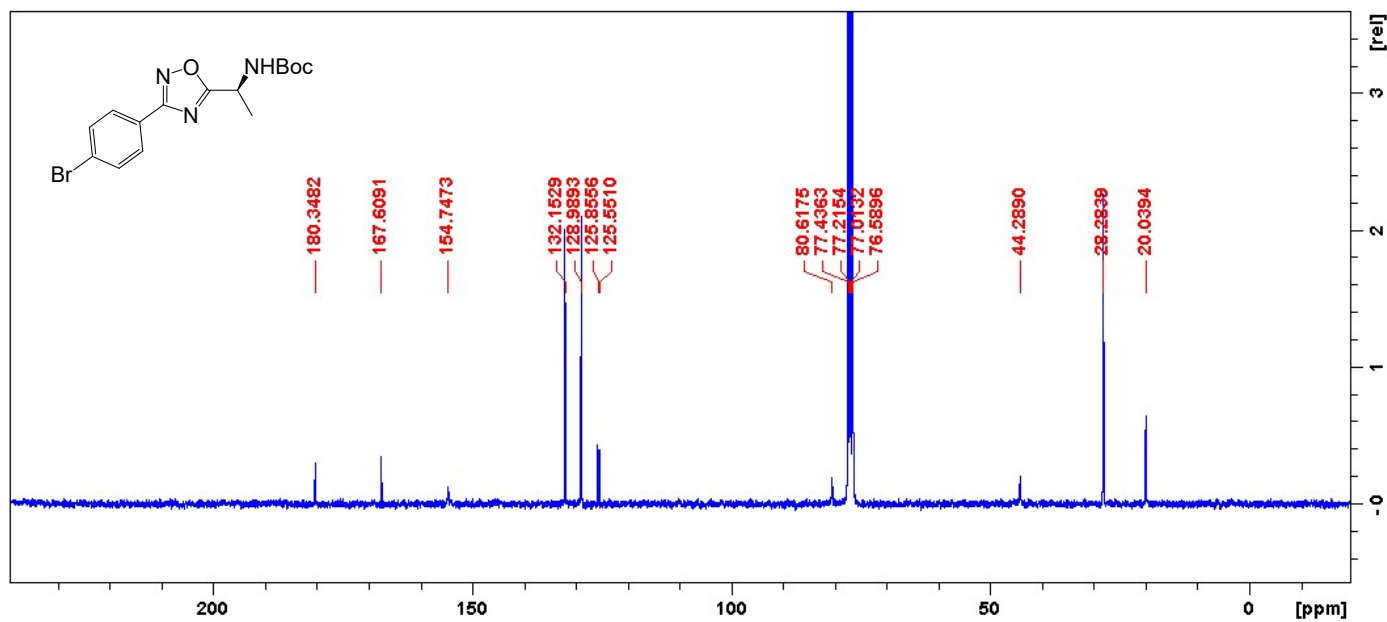

Figure S 6.  $^{13}\text{C}$  NMR spectra of compound 13ab in  $\text{CDCl}_3$ .

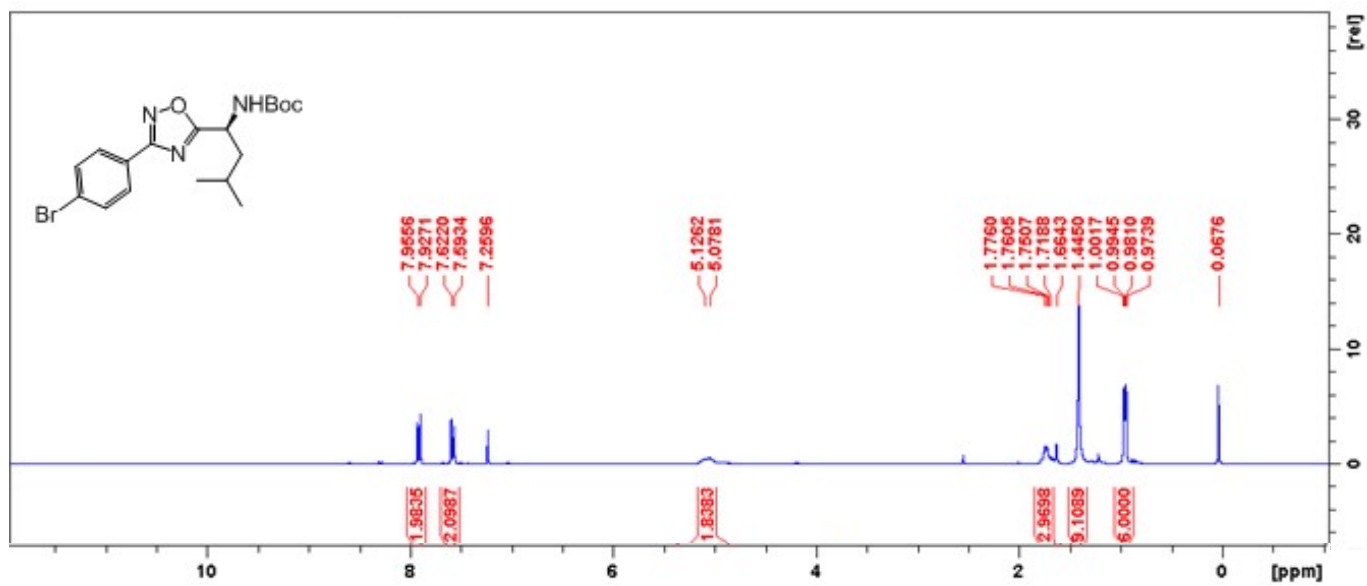

Figure S 7. <sup>1</sup>H NMR spectra of compound **13bb** in CDCl<sub>3</sub>.

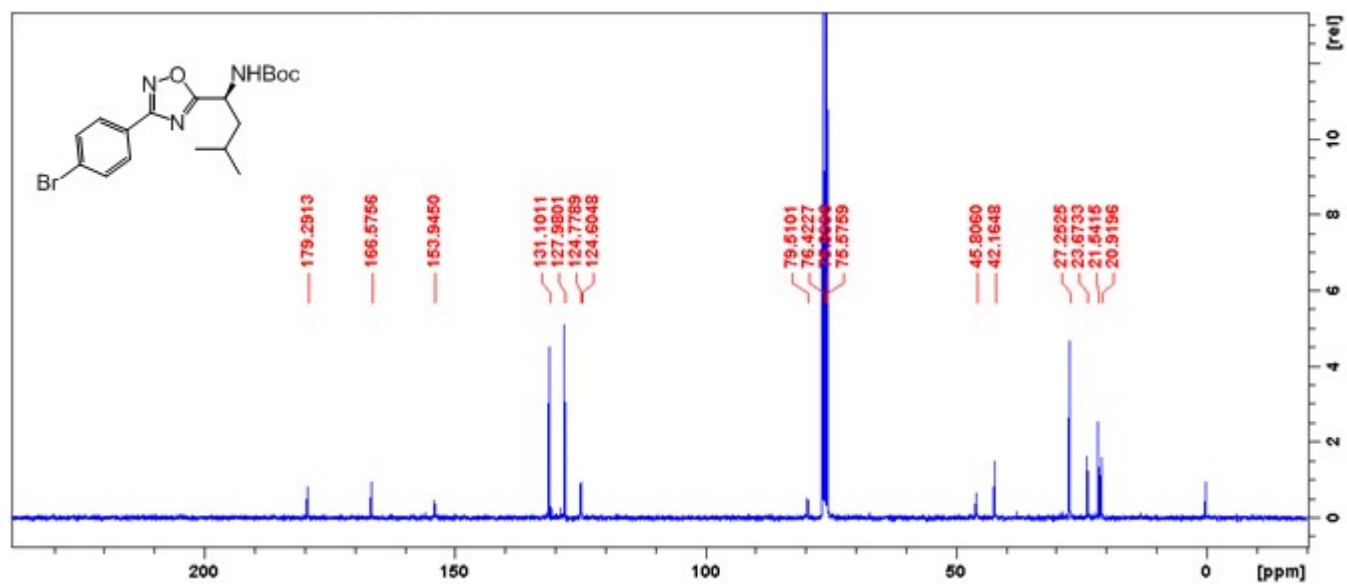

Figure S 7. <sup>13</sup>C NMR spectra of compound **13bb** in CDCl<sub>3</sub>.



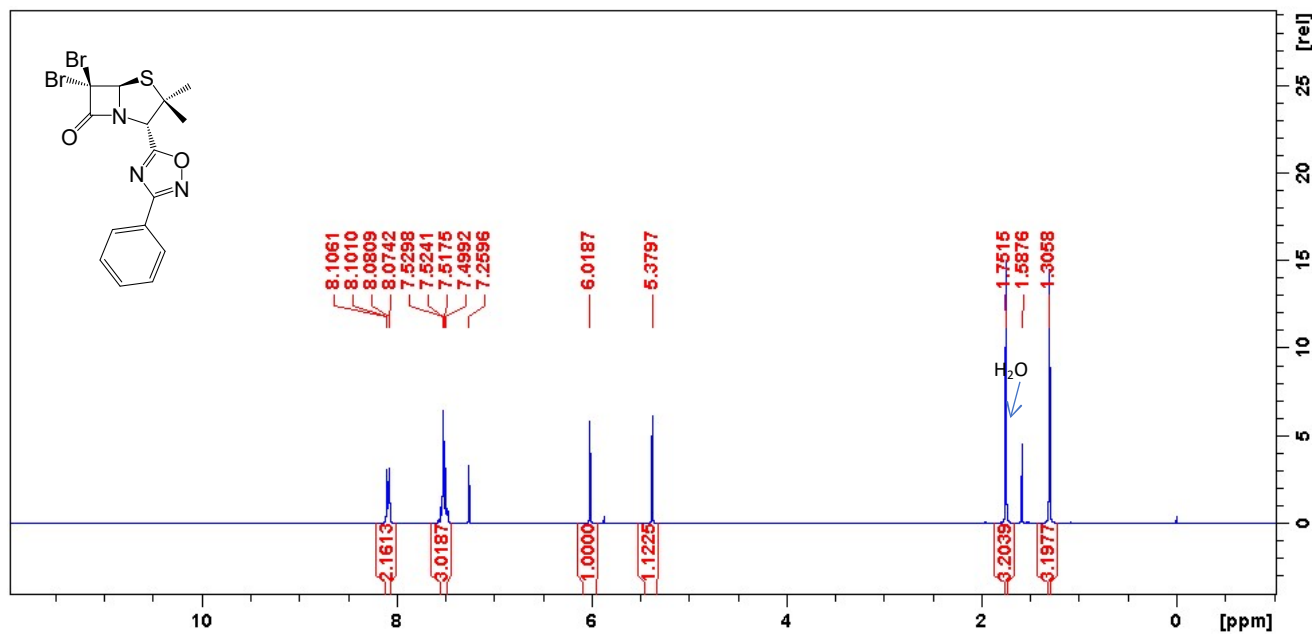

Figure S 8.  $^1\text{H}$  NMR spectra of compound 16aa in  $\text{CDCl}_3$ .

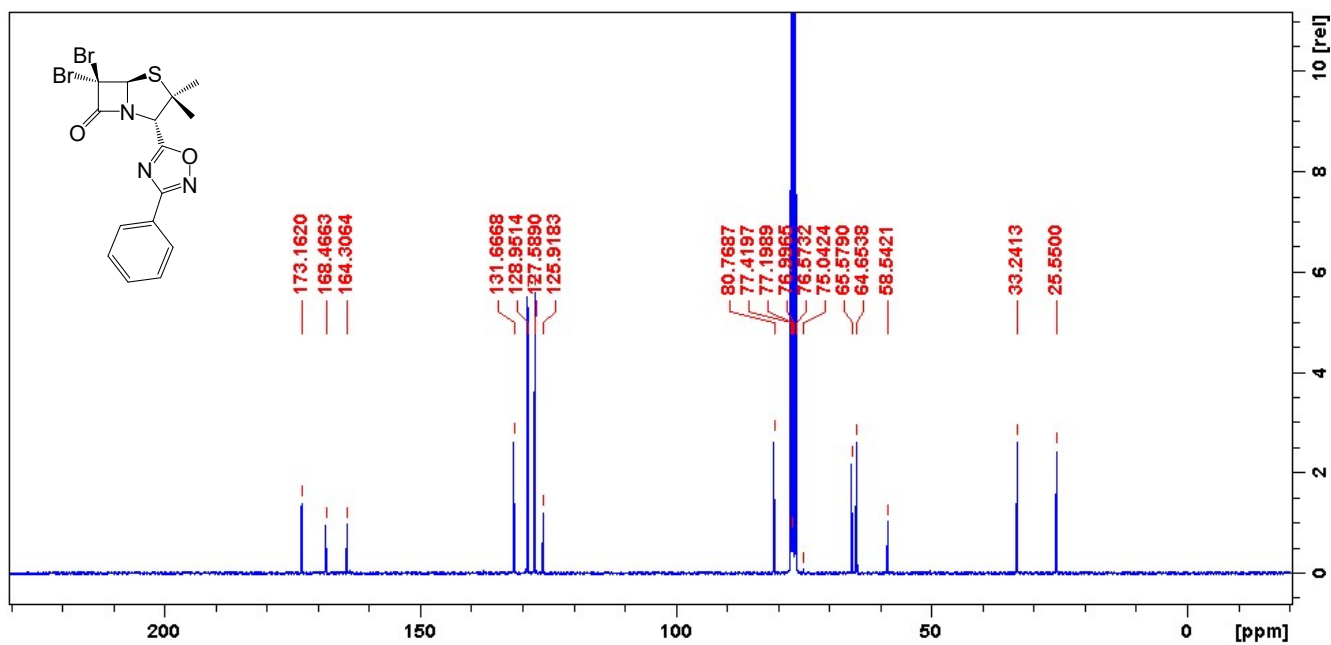

Figure S 8.  $^{13}\text{C}$  NMR spectra of compound 16aa in  $\text{CDCl}_3$ .

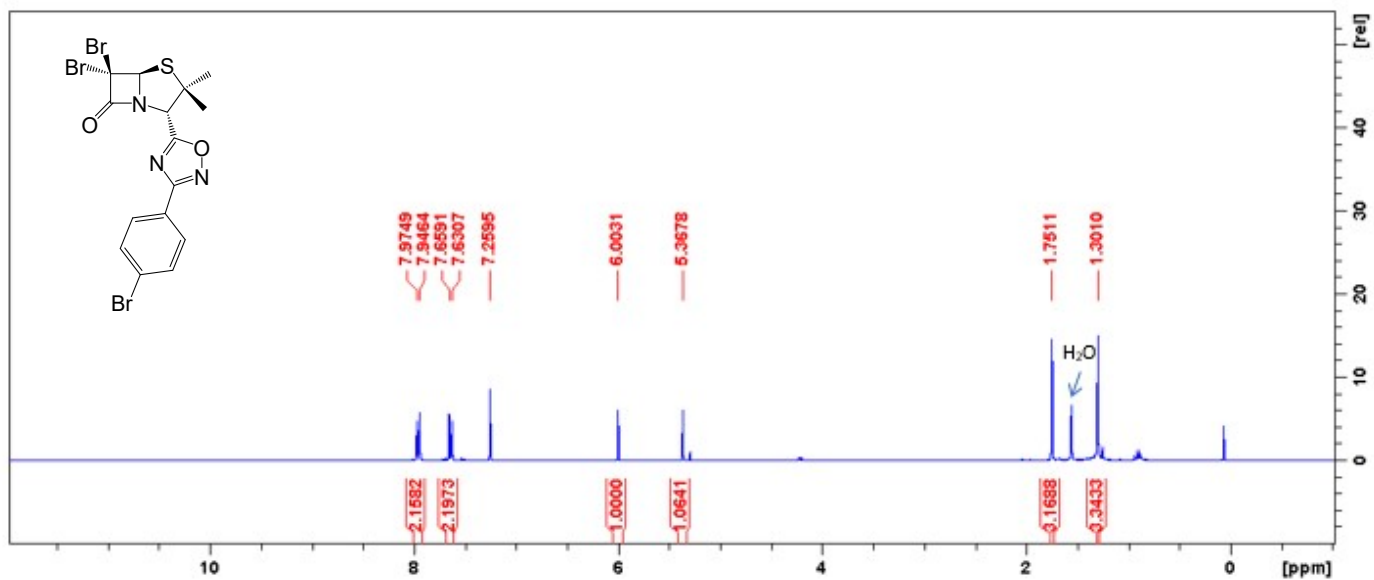

Figure S 9. <sup>1</sup>H NMR spectra of compound 16ab in CDCl<sub>3</sub>.

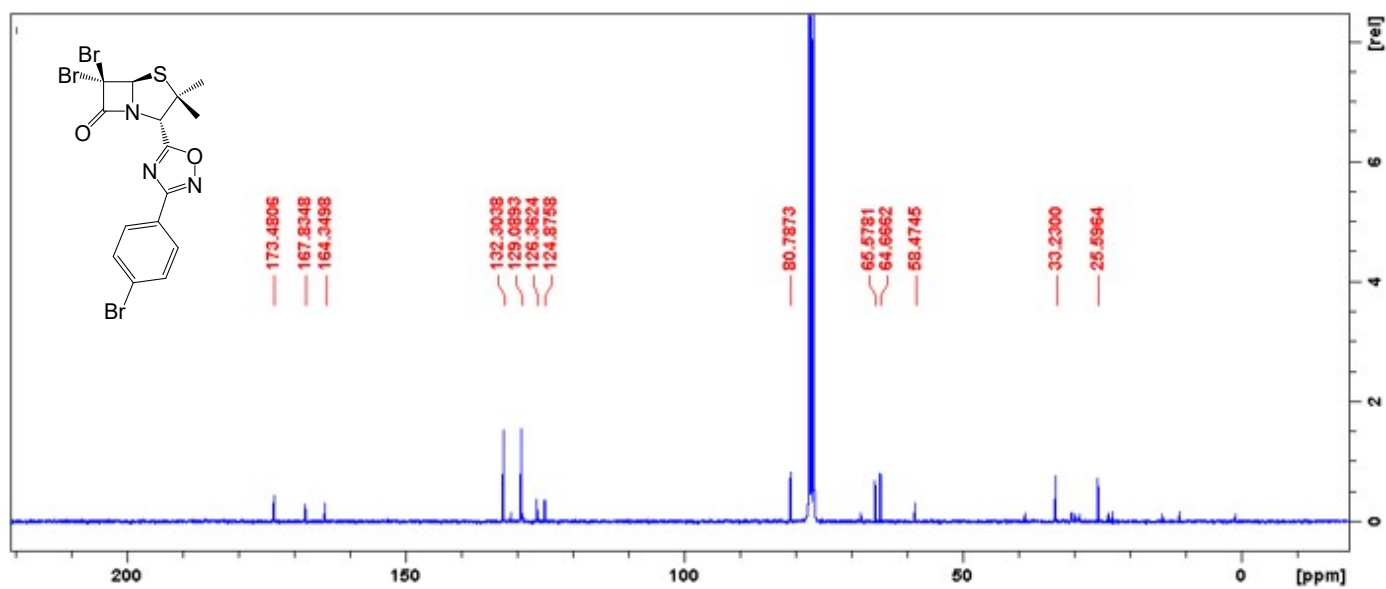

Figure S 9. <sup>13</sup>C NMR spectra of compound 16ab in CDCl<sub>3</sub>.

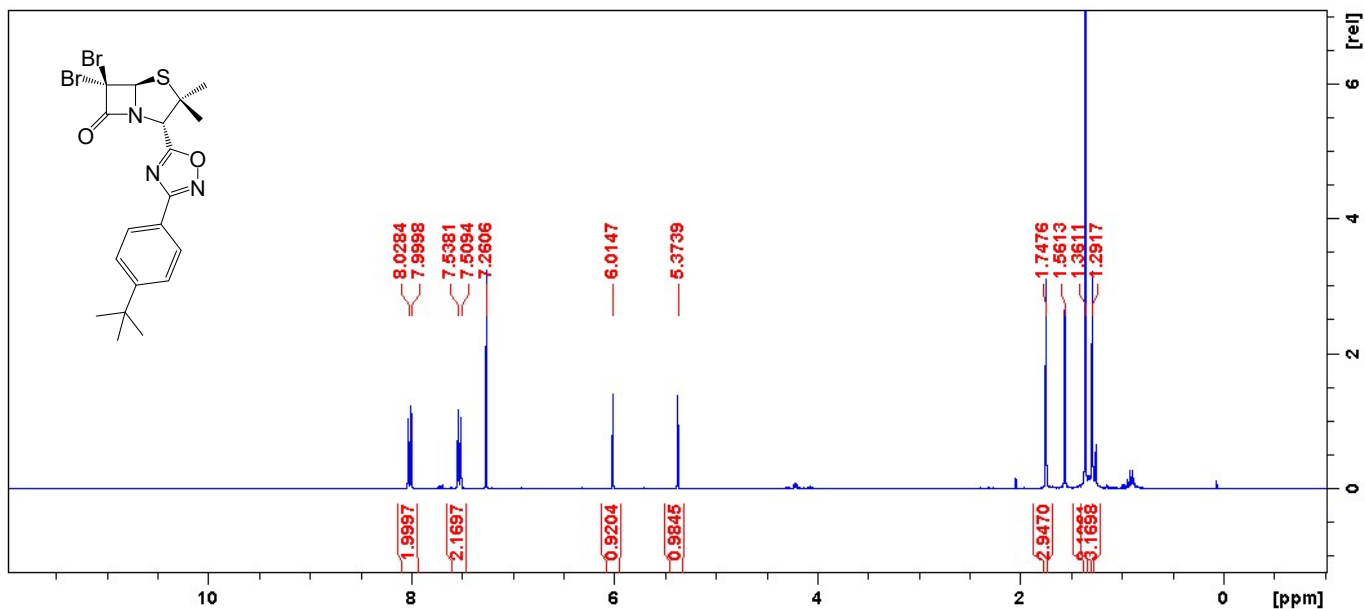

Figure S 10. <sup>1</sup>H NMR spectra of compound 16ac in CDCl<sub>3</sub>.

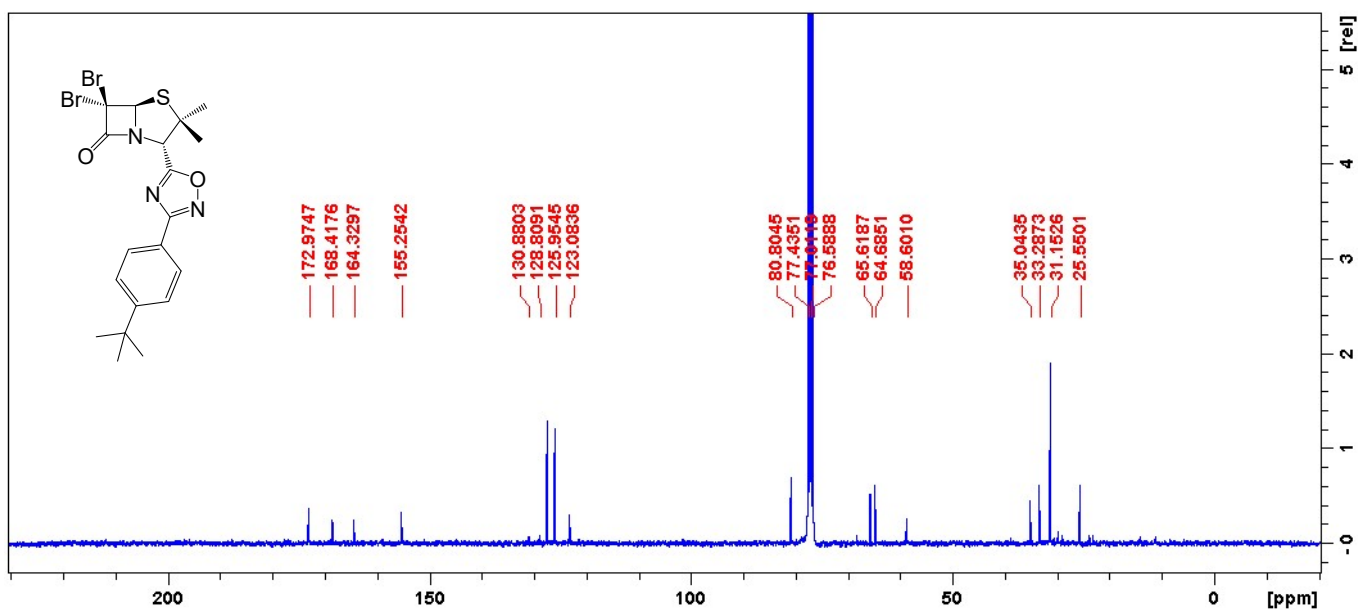

Figure S 10. <sup>13</sup>C NMR spectra of compound 16ac in CDCl<sub>3</sub>.

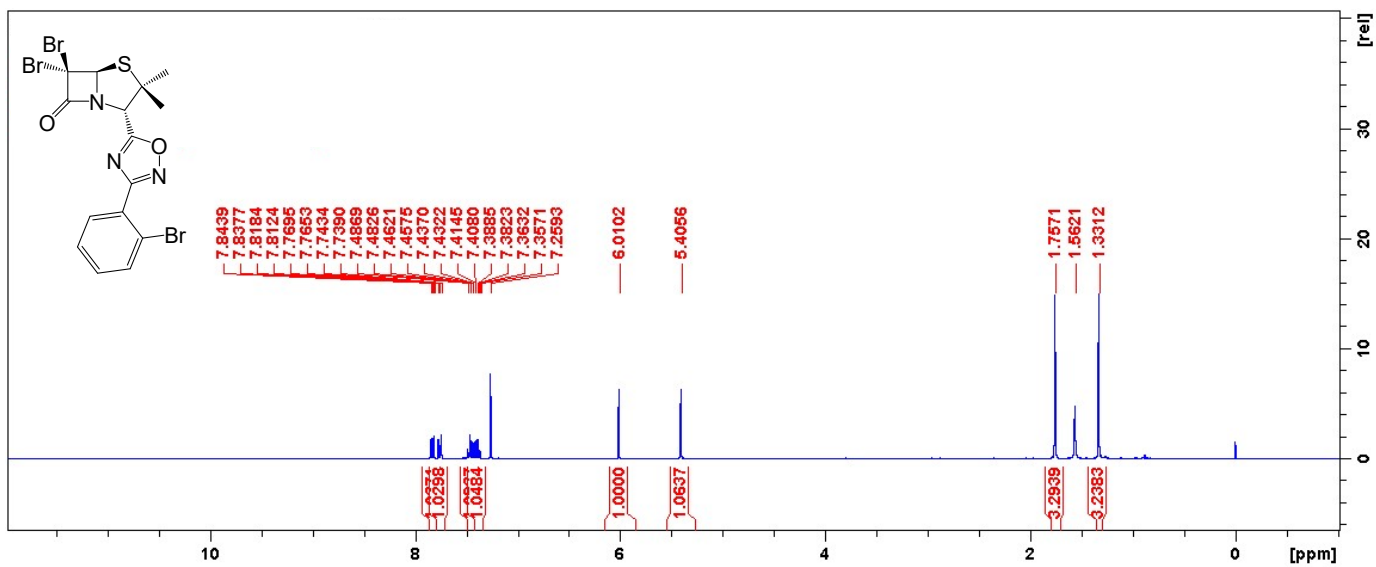

Figure S 11. <sup>1</sup>H NMR spectra of compound 16ad in CDCl<sub>3</sub>.

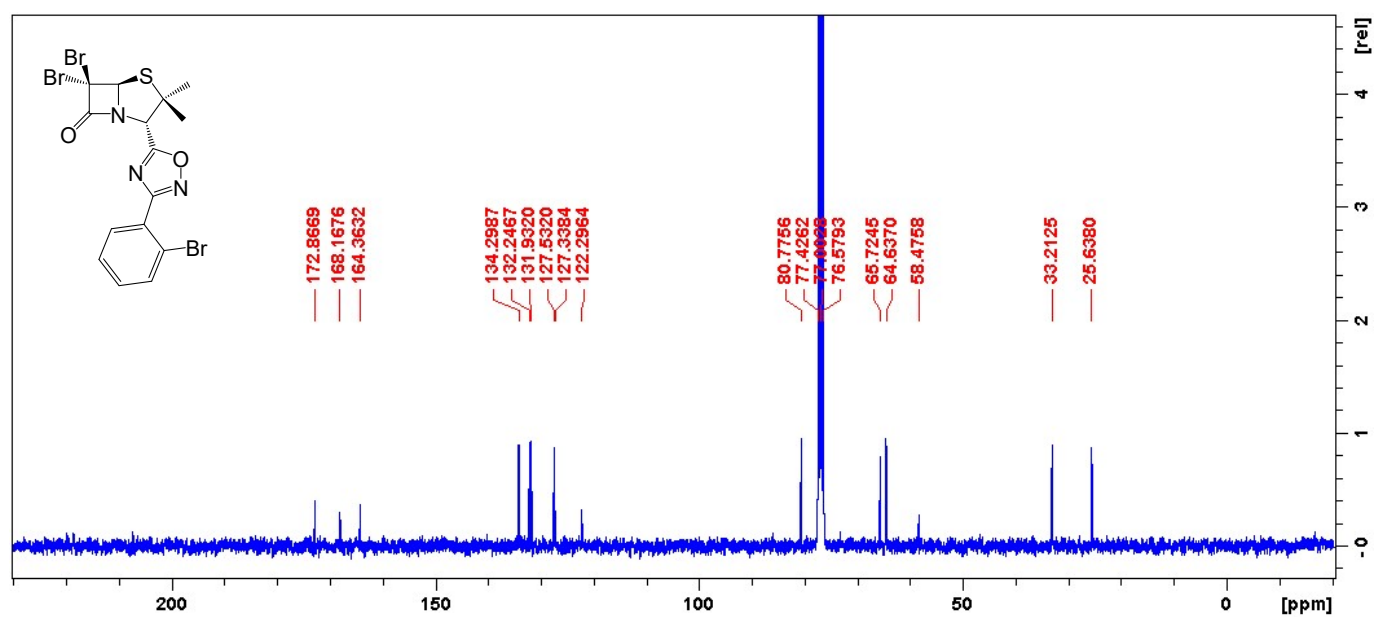

Figure S 11. <sup>13</sup>C NMR spectra of compound 16ad in CDCl<sub>3</sub>.

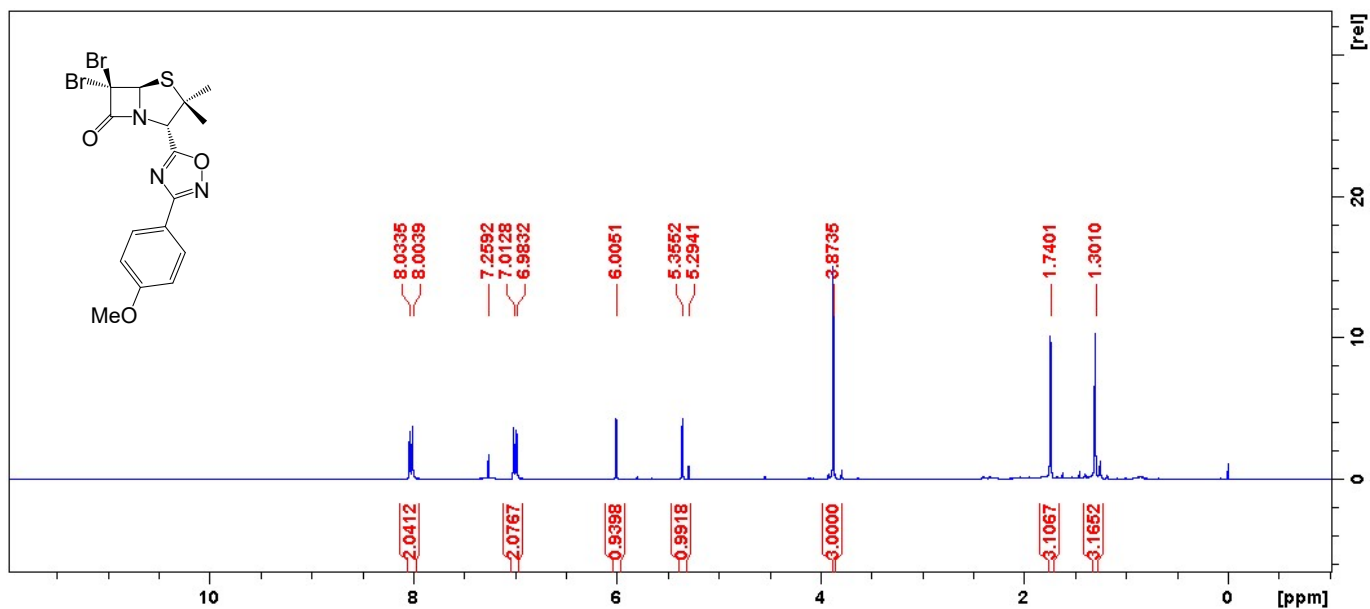

Figure S 12. <sup>1</sup>H NMR spectra of compound 16ae in CDCl<sub>3</sub>.

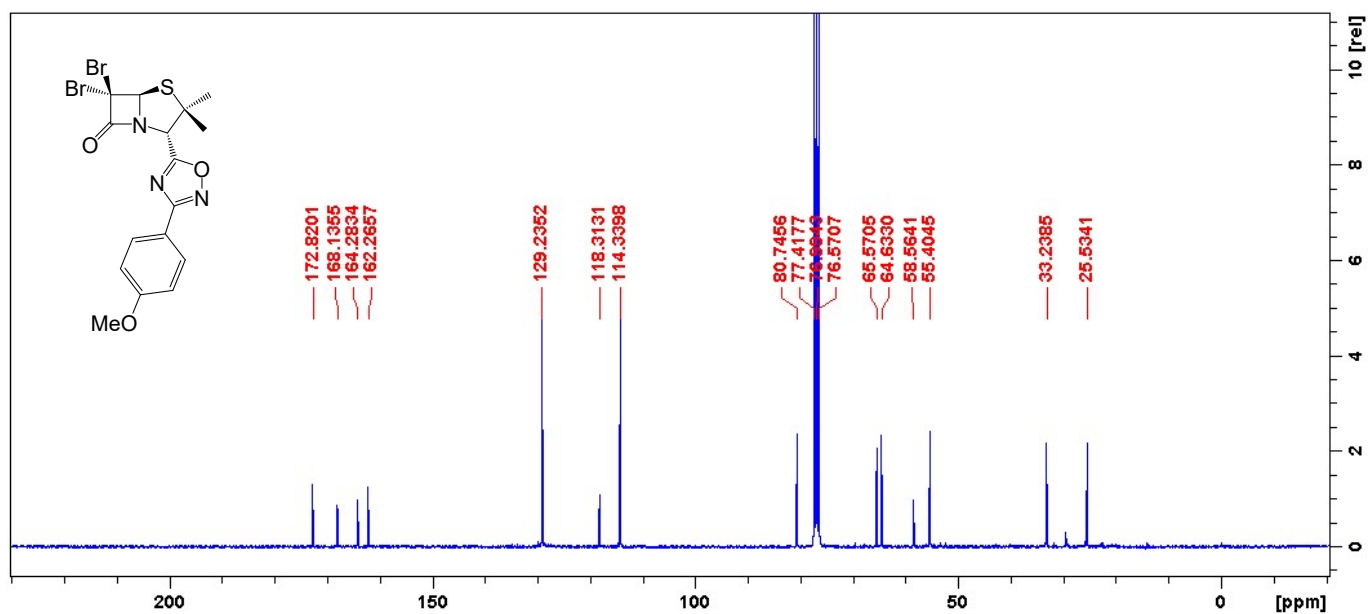

Figure S 12. <sup>13</sup>C NMR spectra of compound 16ae in CDCl<sub>3</sub>.

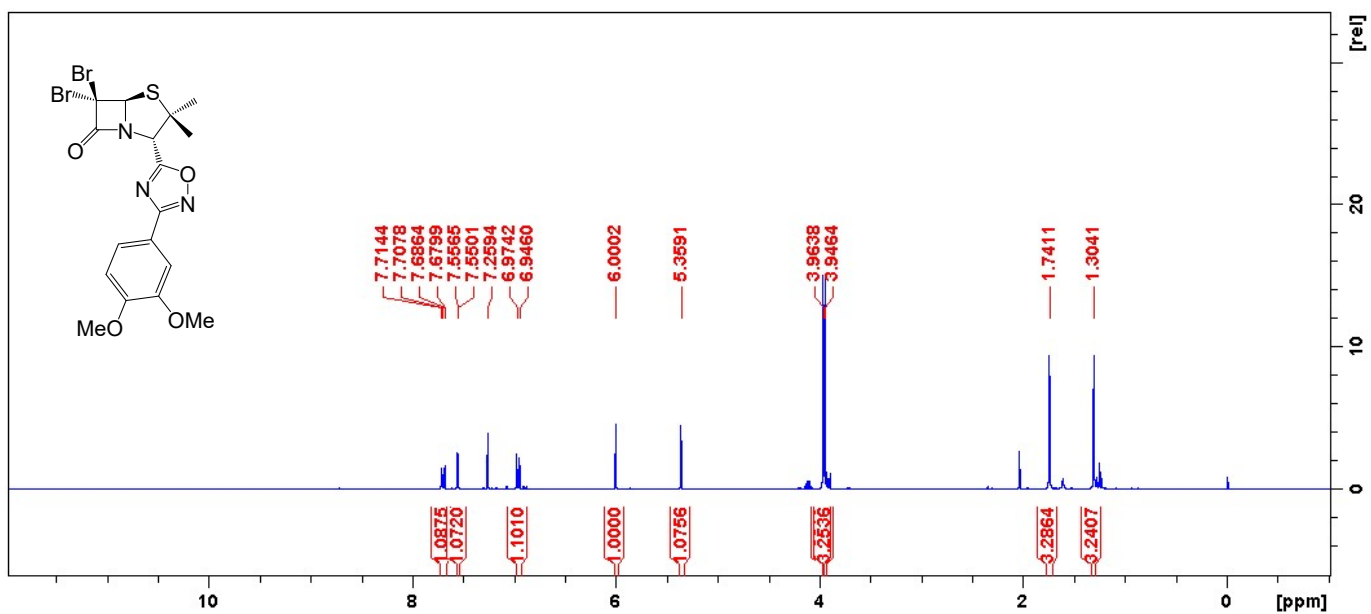

Figure S 13. <sup>1</sup>H NMR spectra of compound 16af in CDCl<sub>3</sub>.

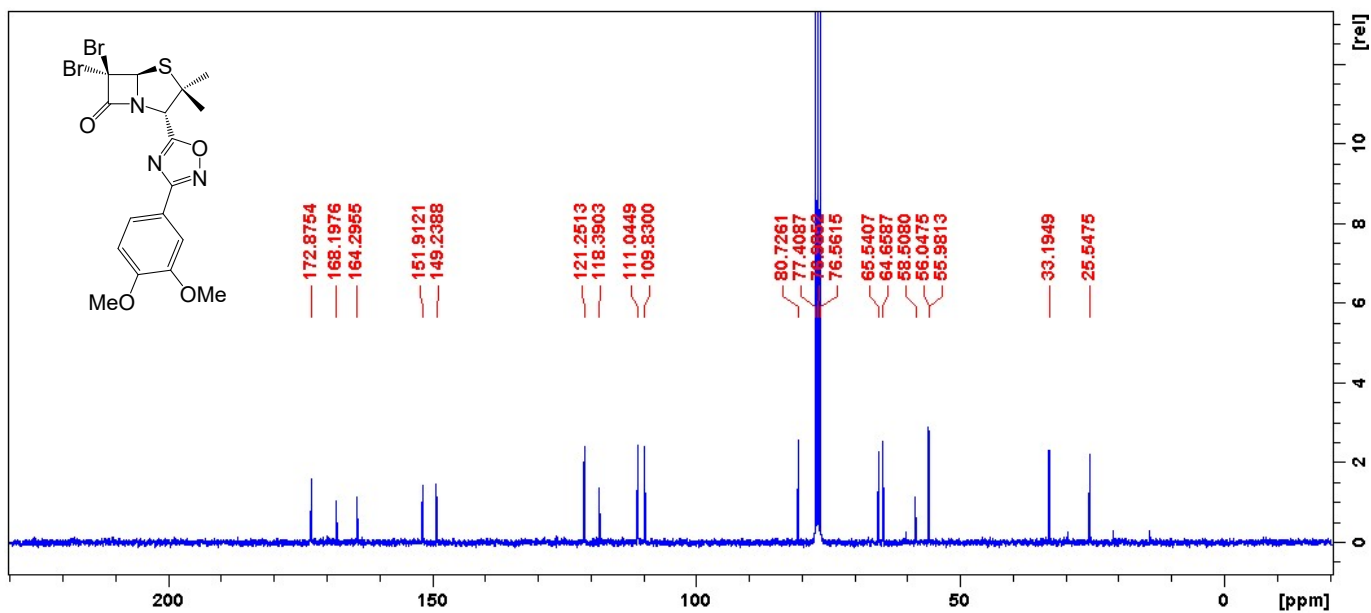

Figure S 13. <sup>13</sup>C NMR spectra of compound 16af in CDCl<sub>3</sub>.

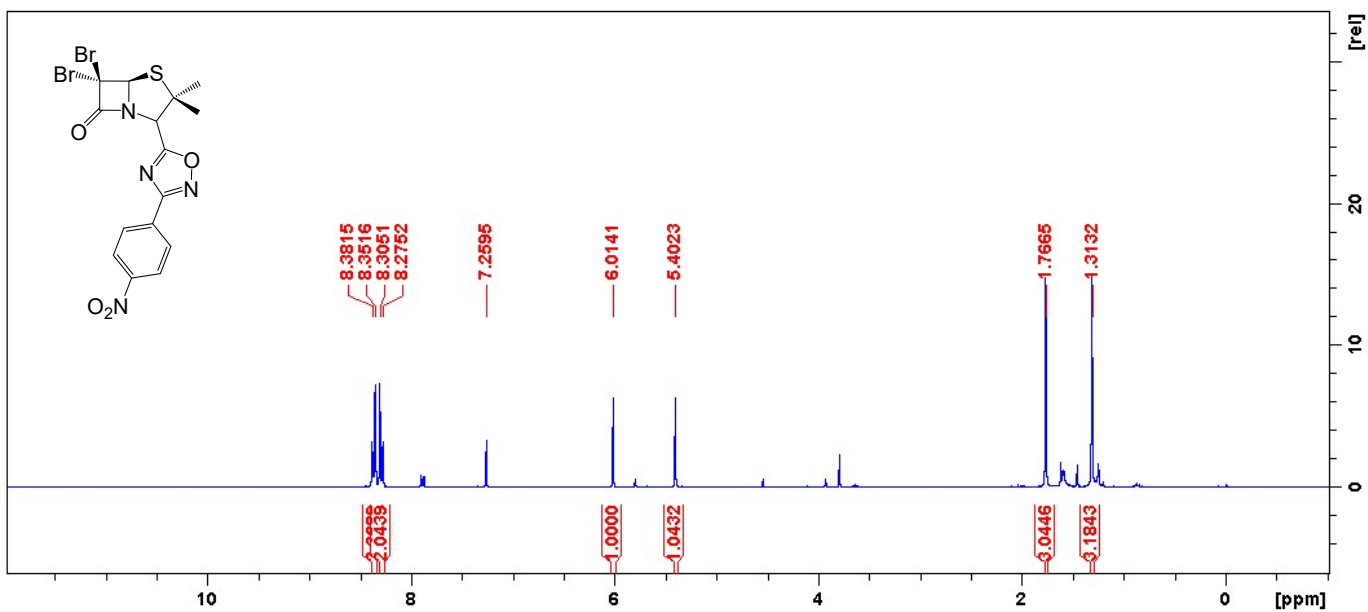

Figure S 14.  $^1\text{H}$  NMR spectra of compound 16ag in  $\text{CDCl}_3$ .

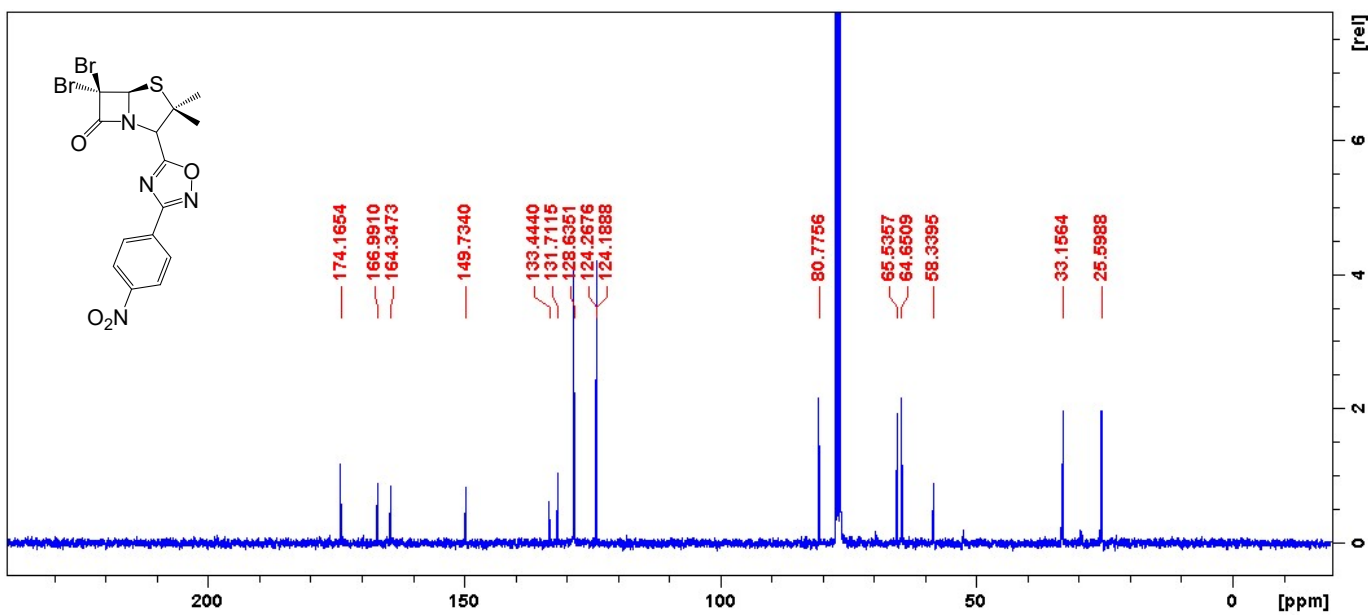

Figure S 14.  $^{13}\text{C}$  NMR spectra of compound 16ag in  $\text{CDCl}_3$ .

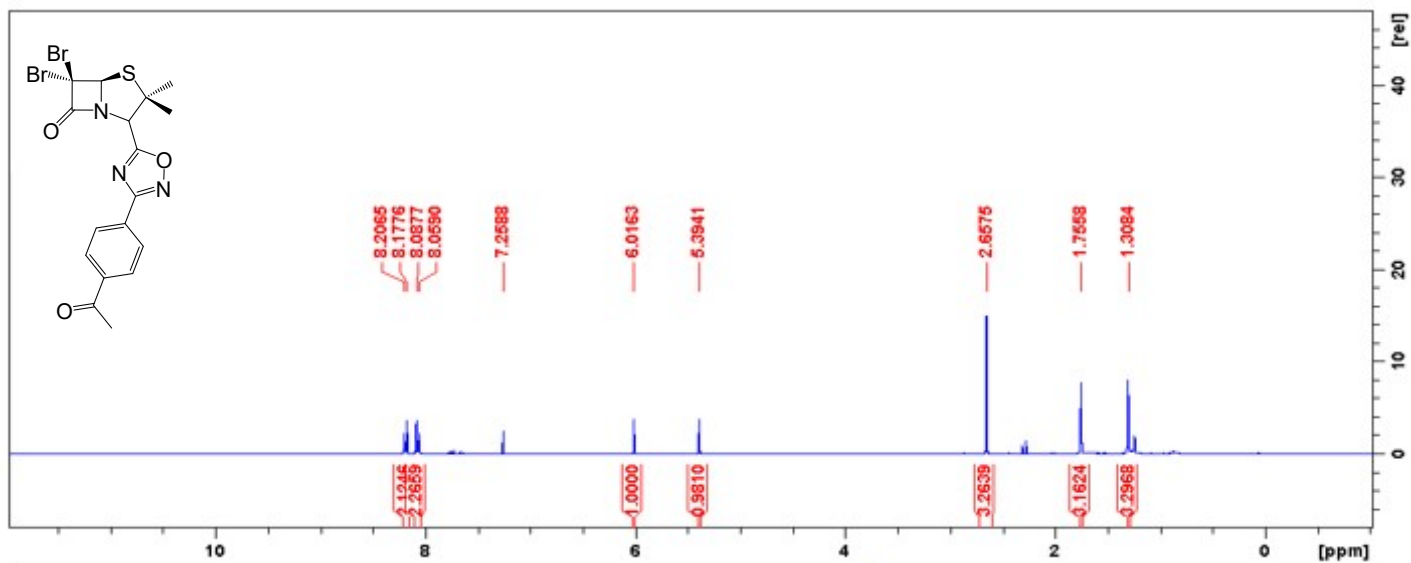

Figure S 15.  $^1\text{H}$  NMR spectra of compound 16ah in  $\text{CDCl}_3$ .

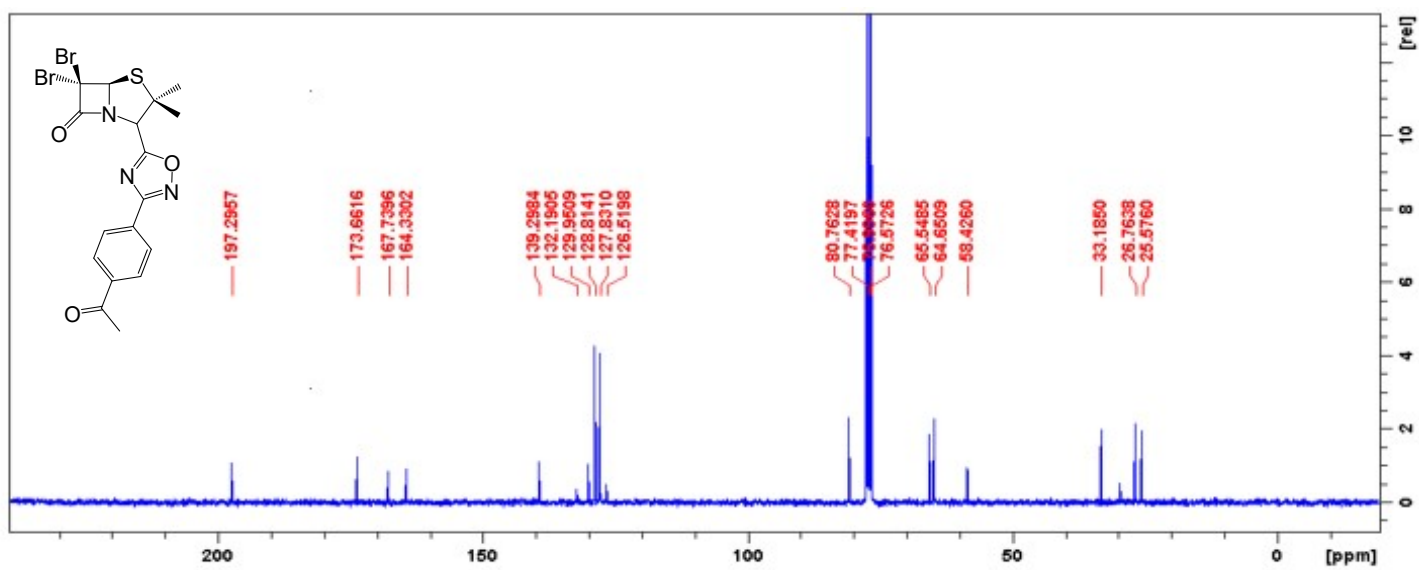

Figure S 15.  $^{13}\text{C}$  NMR spectra of compound 16ah in  $\text{CDCl}_3$ .



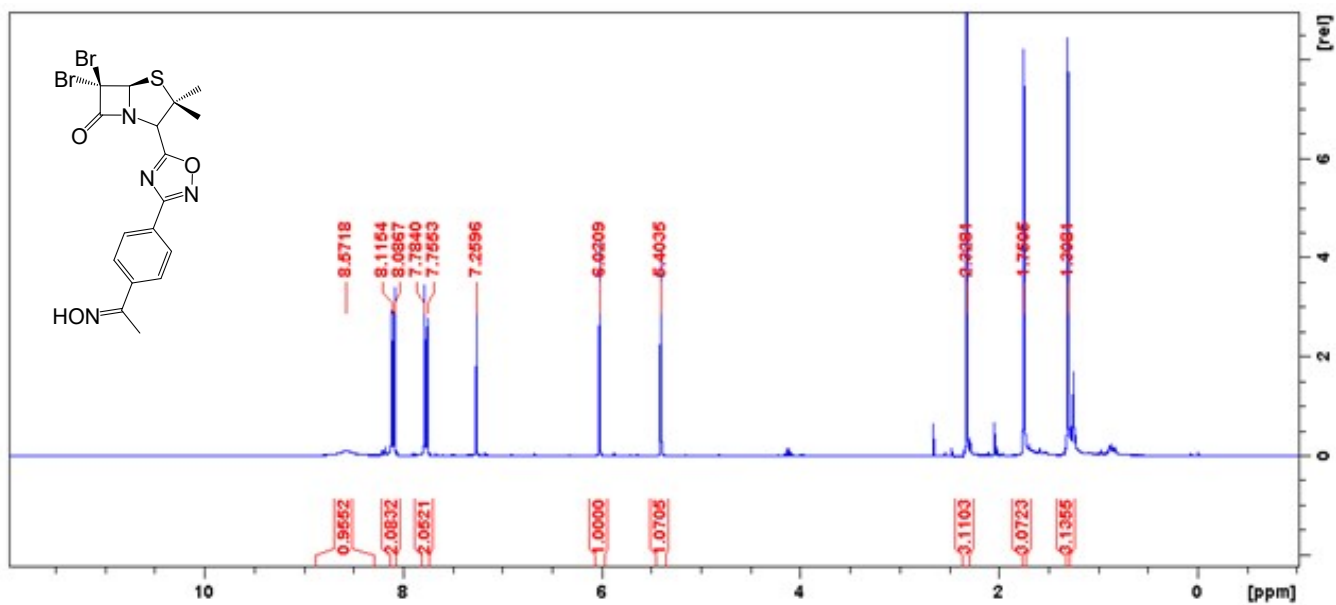

Figure S 16. <sup>1</sup>H NMR spectra of compound 16ai in CDCl<sub>3</sub>.

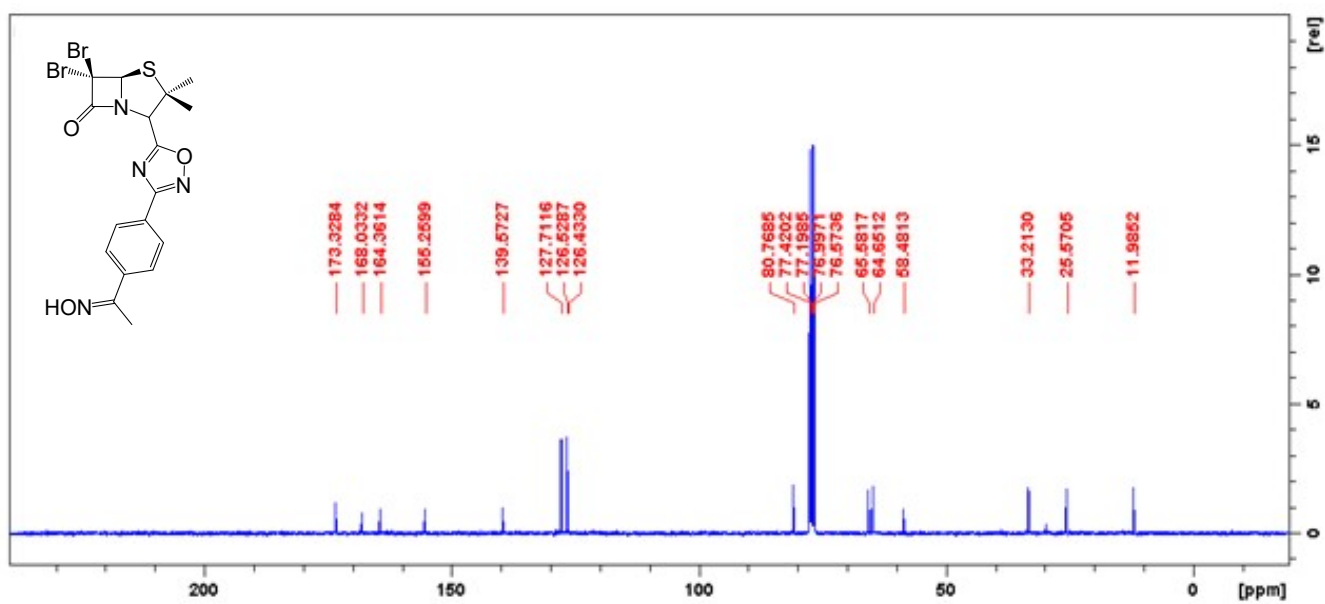

Figure S 16. <sup>13</sup>C NMR spectra of compound 16ai in CDCl<sub>3</sub>.

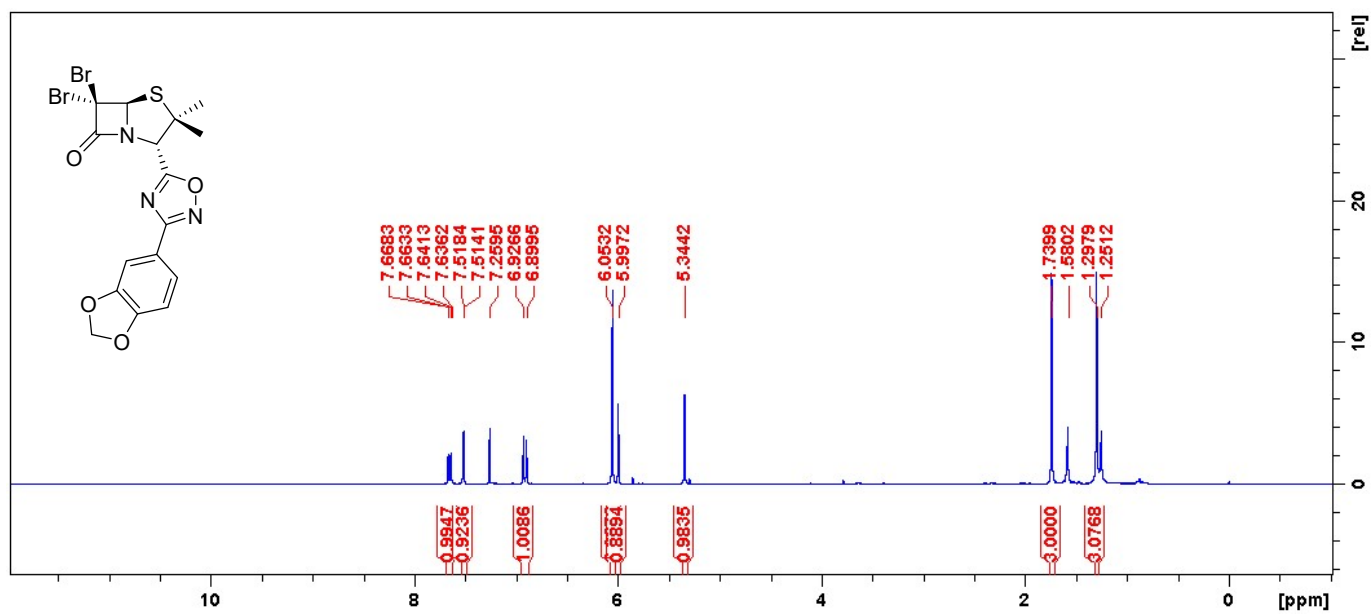

Figure S 17.  $^1\text{H}$  NMR spectra of compound 16aj in  $\text{CDCl}_3$ .

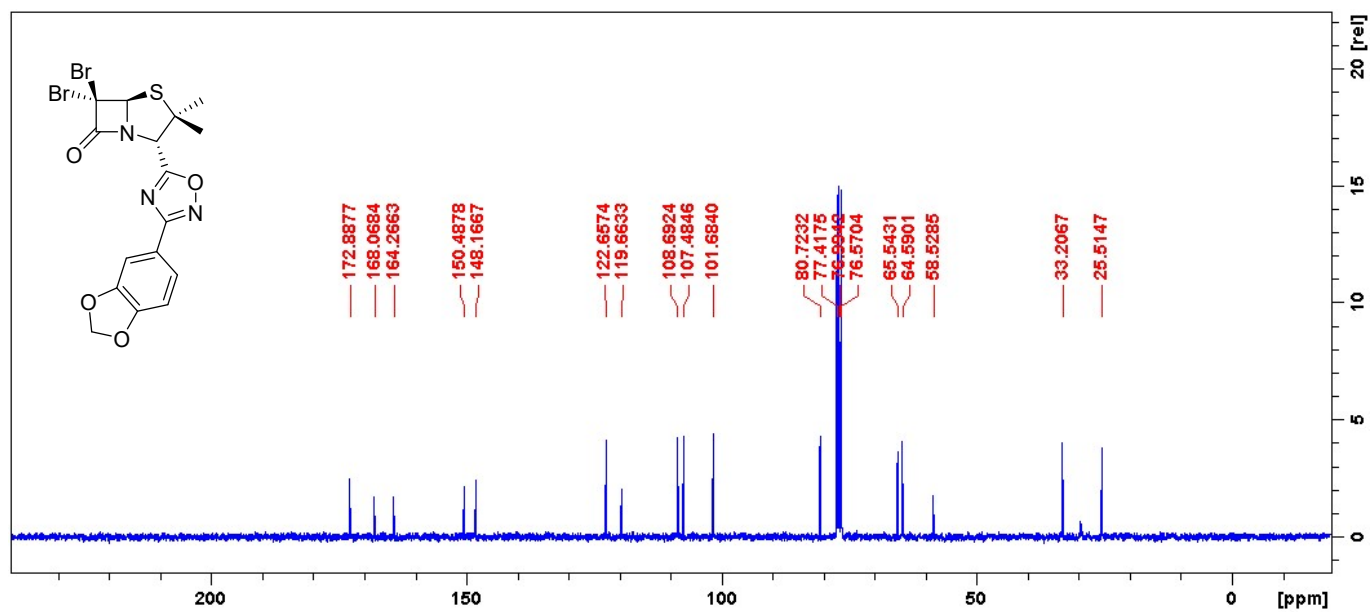

Figure S 17.  $^{13}\text{C}$  NMR spectra of compound 16aj in  $\text{CDCl}_3$ .

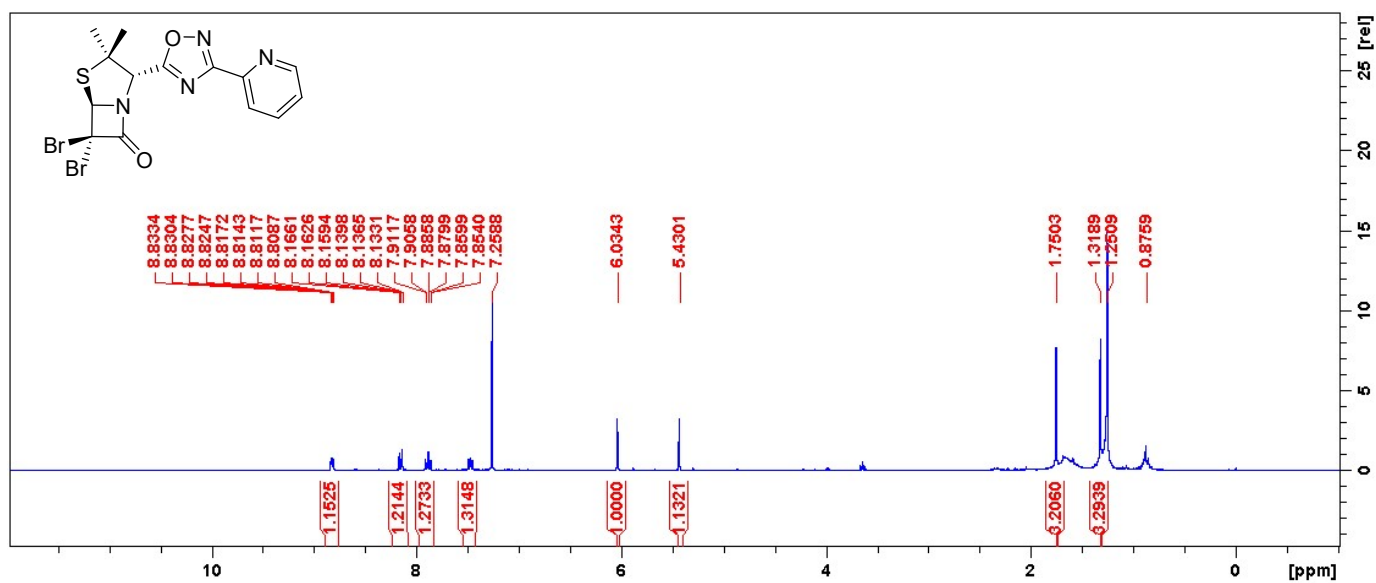

Figure S 18.  $^1\text{H}$  NMR spectra of compound 16ak in  $\text{CDCl}_3$ .

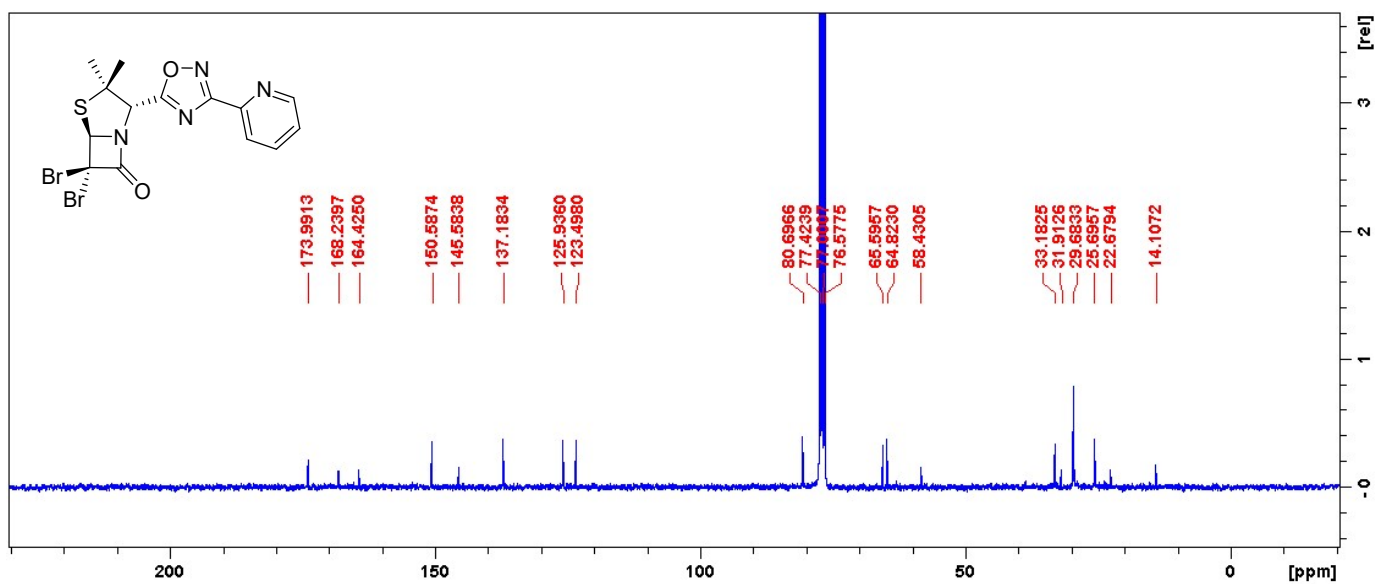

Figure S 18.  $^{13}\text{C}$  NMR spectra of compound 16ak in  $\text{CDCl}_3$ .

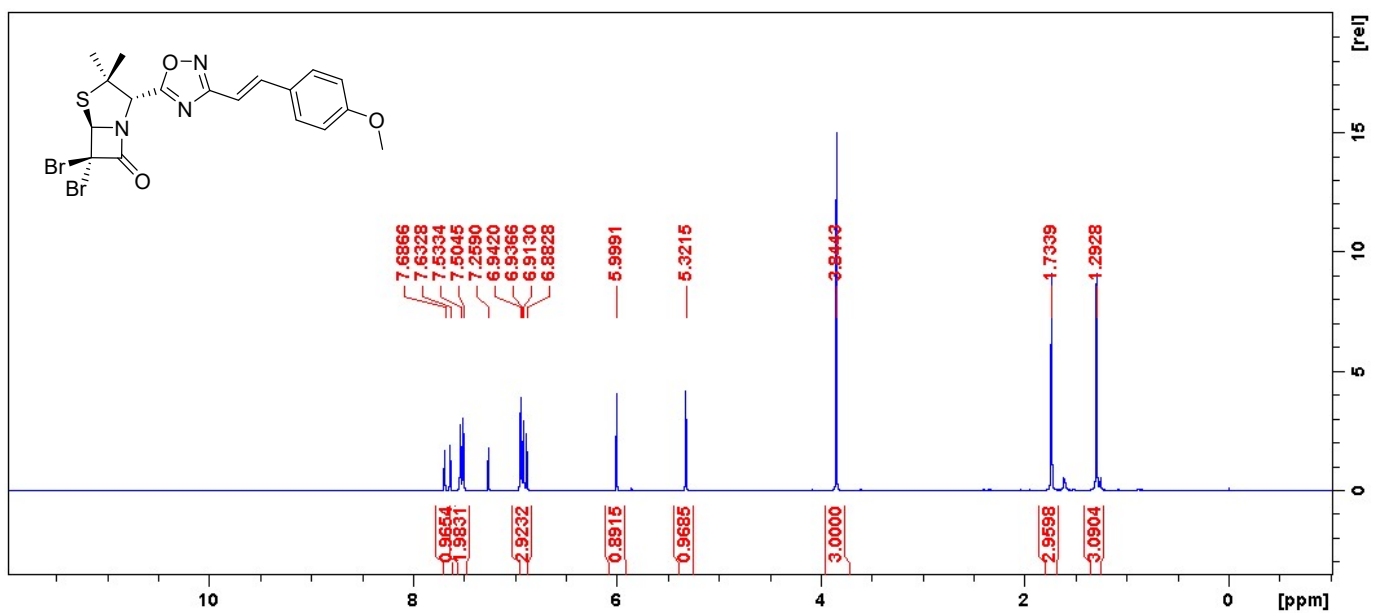

Figure S 19. <sup>1</sup>H NMR spectra of compound 16am in CDCl<sub>3</sub>.

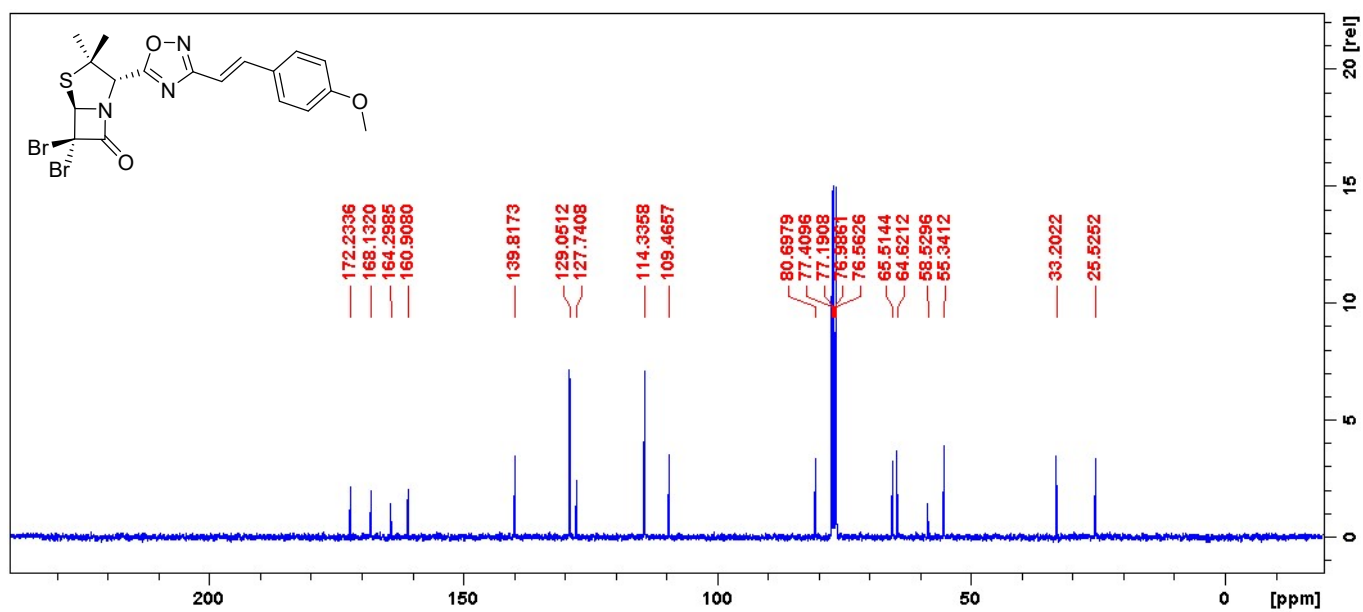

Figure S 19. <sup>13</sup>C NMR spectra of compound 16am in CDCl<sub>3</sub>.

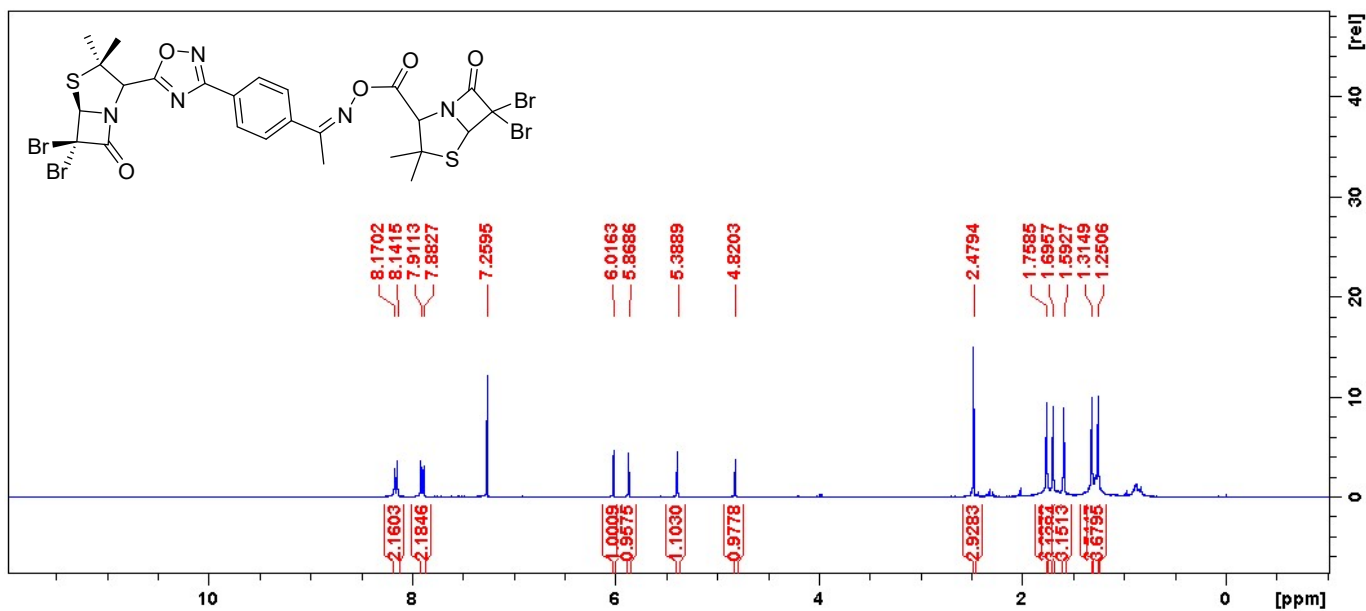

Figure S 20.  $^1\text{H}$  NMR spectra of compound **17ai** in  $\text{CDCl}_3$ .

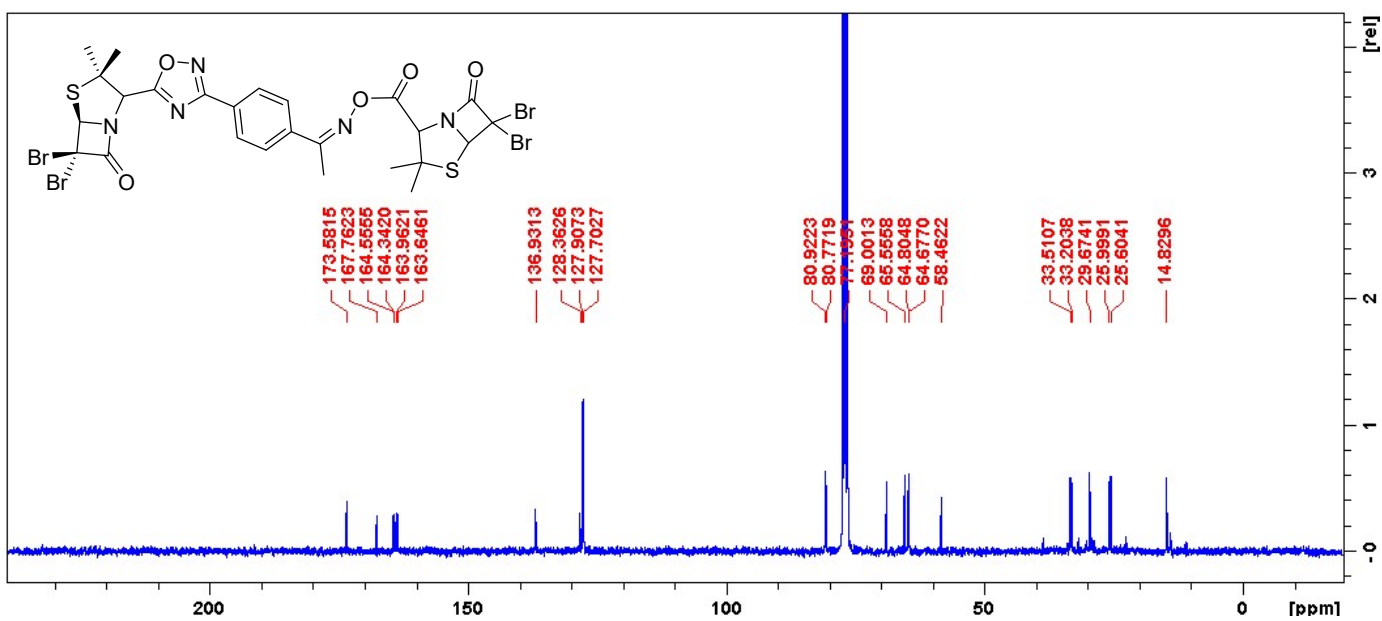

Figure S 20.  $^{13}\text{C}$  NMR spectra of compound **17ai** in  $\text{CDCl}_3$ .

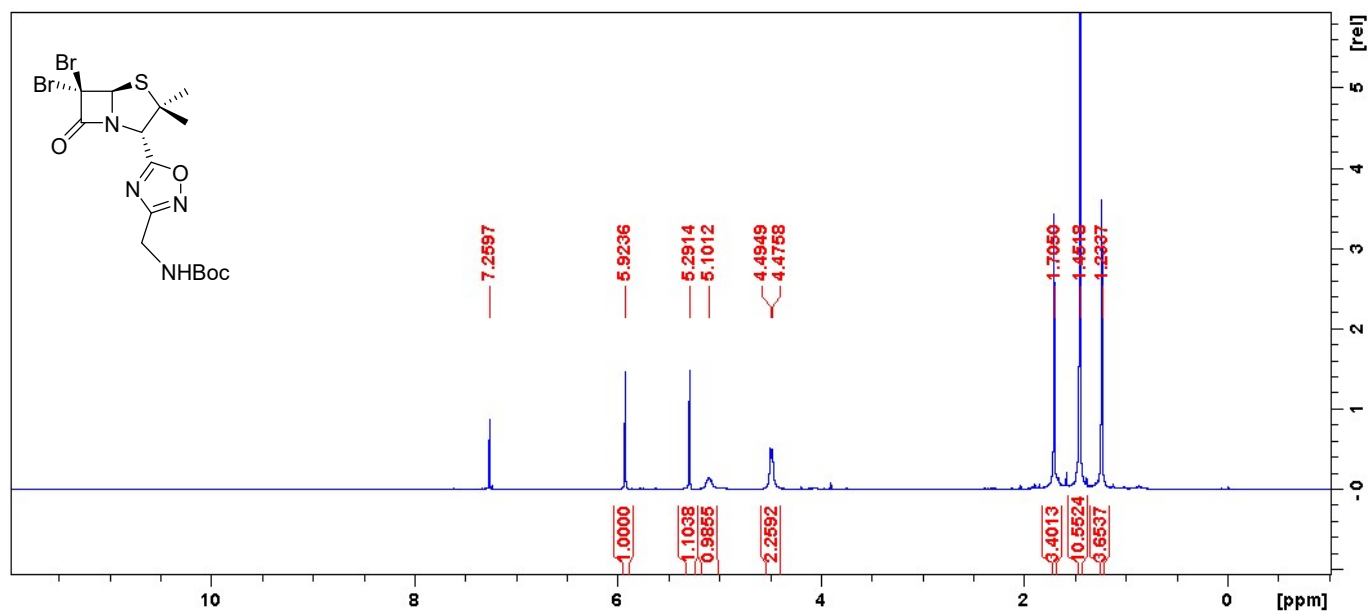

Figure S 21.  $^1\text{H}$  NMR spectra of compound 22aa in  $\text{CDCl}_3$ .

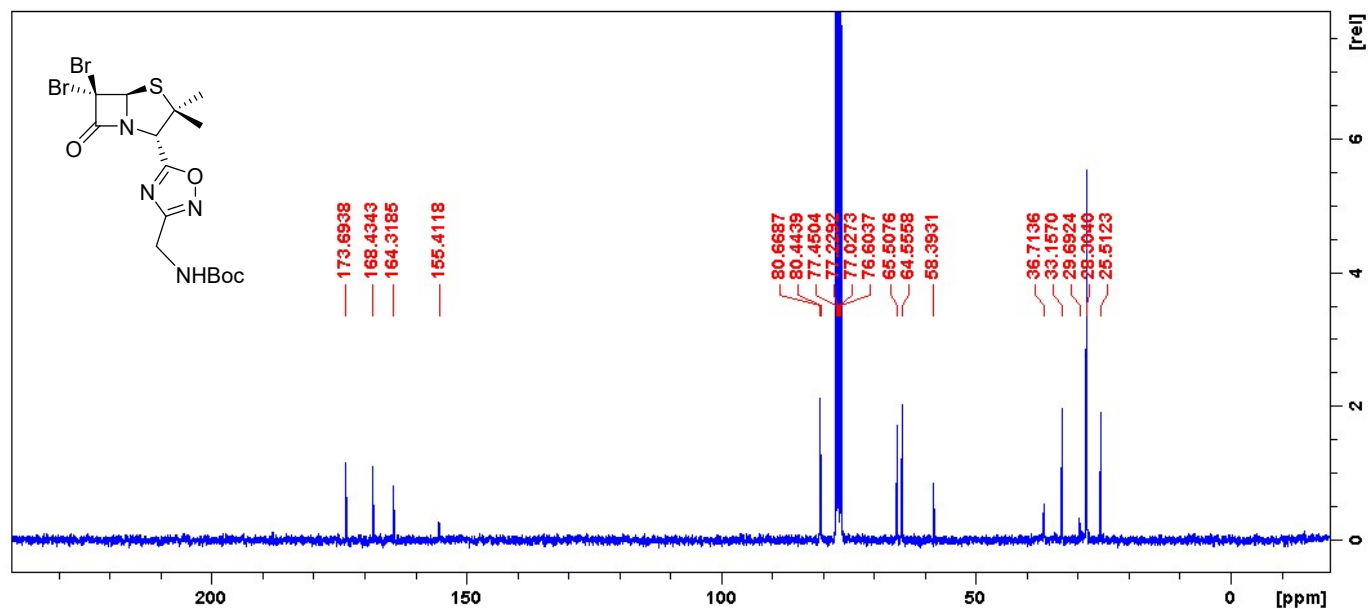

Figure S 21.  $^{13}\text{C}$  NMR spectra of compound 22aa in  $\text{CDCl}_3$ .

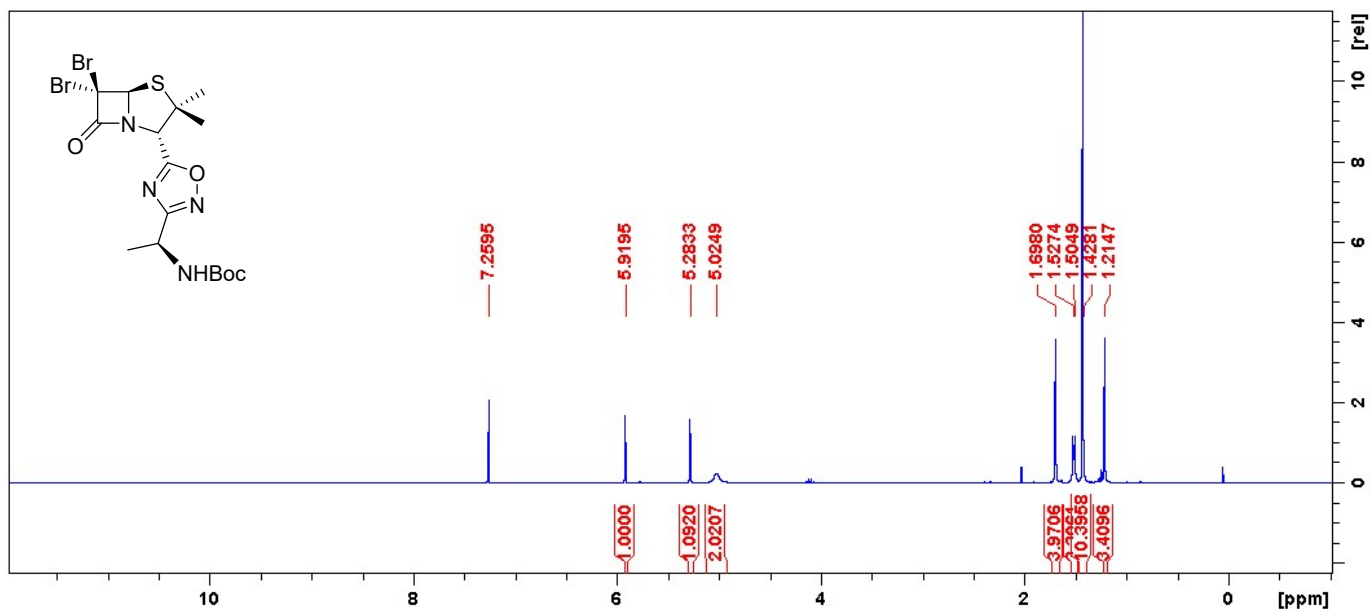

Figure S 22. <sup>1</sup>H NMR spectra of compound **22ab** in CDCl<sub>3</sub>.

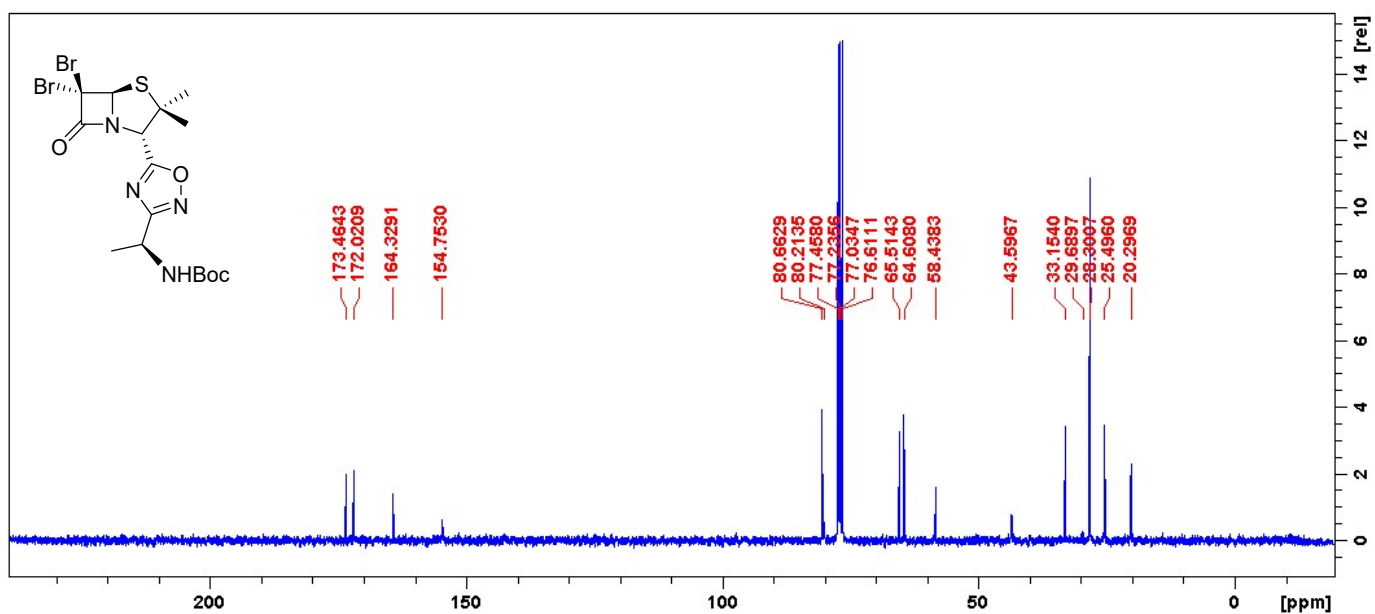

Figure S 22. <sup>13</sup>C NMR spectra of compound **22ab** in CDCl<sub>3</sub>.

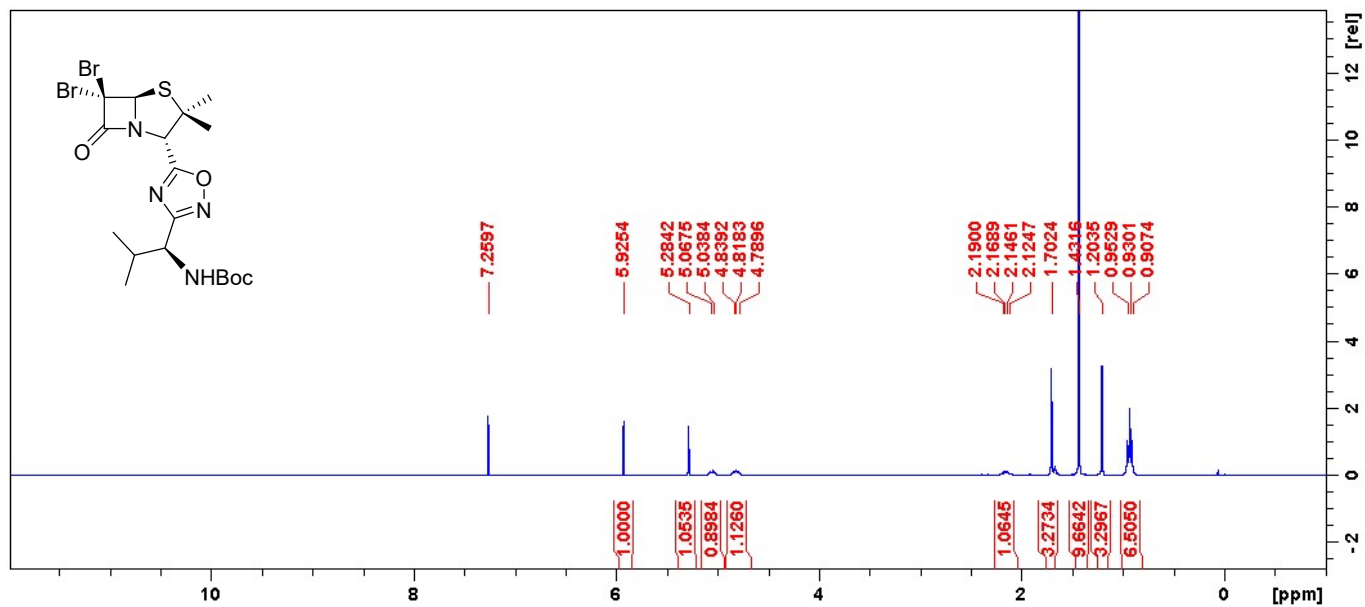

Figure S 23. <sup>1</sup>H NMR spectra of compound 22ac in CDCl<sub>3</sub>.

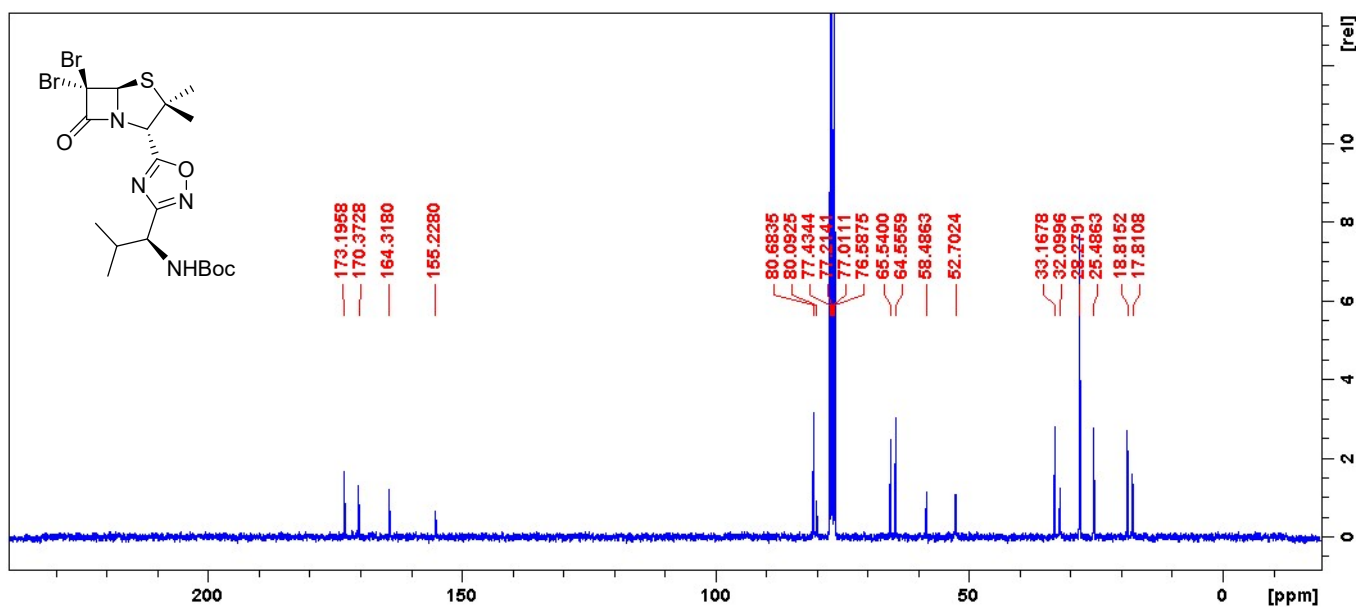

Figure S 23. <sup>13</sup>C NMR spectra of compound 22ac in CDCl<sub>3</sub>.



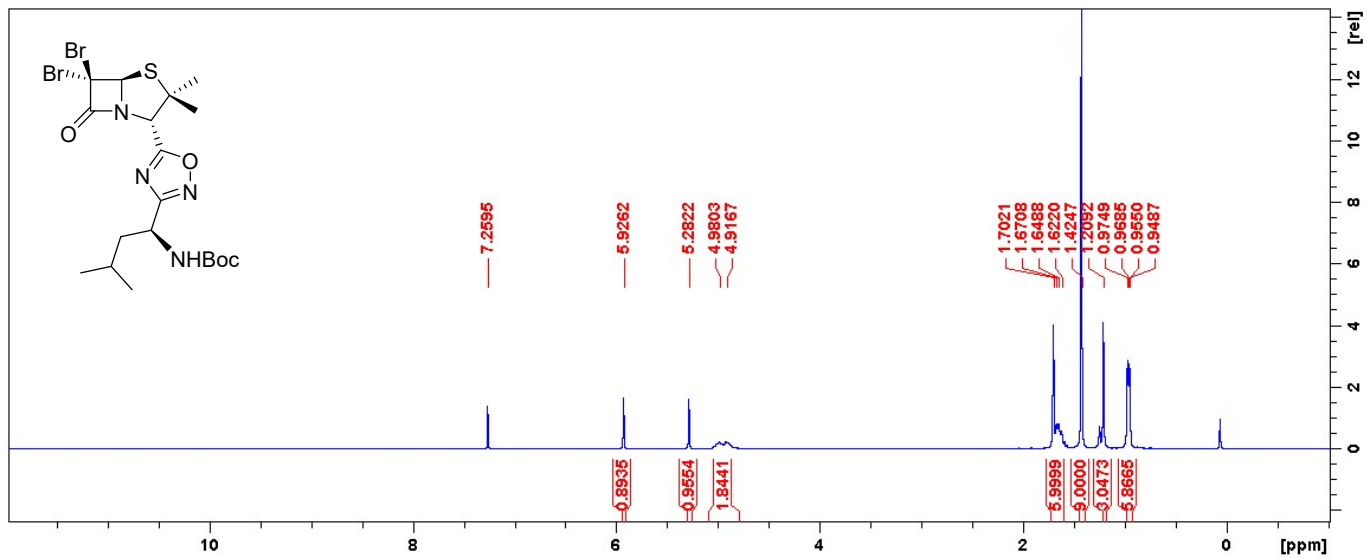

Figure S 24. <sup>1</sup>H NMR spectra of compound 22ad in CDCl<sub>3</sub>.

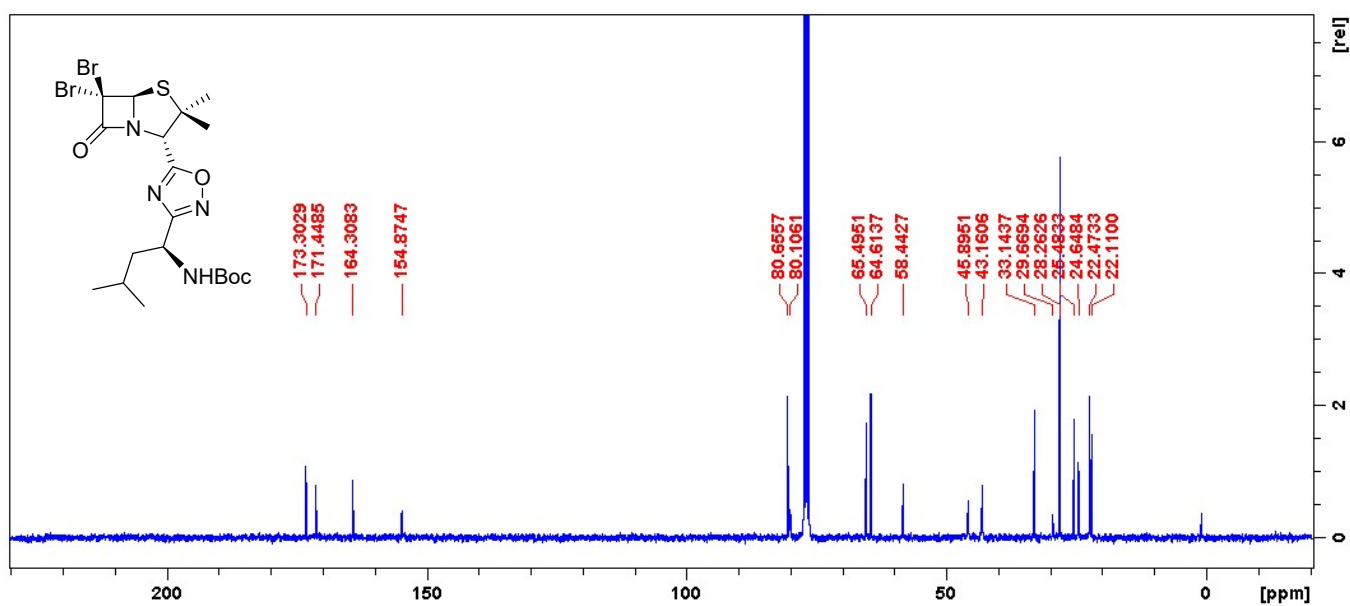

Figure S 24. <sup>13</sup>C NMR spectra of compound 22ad in CDCl<sub>3</sub>.

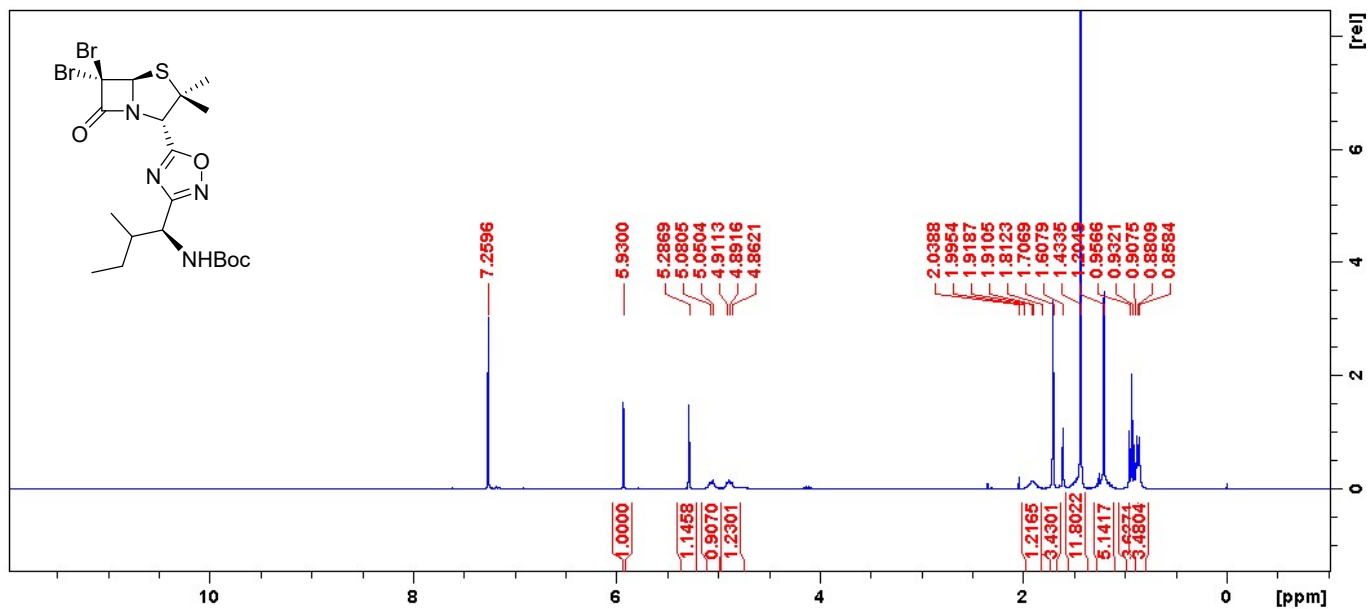

Figure S 25. <sup>1</sup>H NMR spectra of compound 22ae in CDCl<sub>3</sub>.

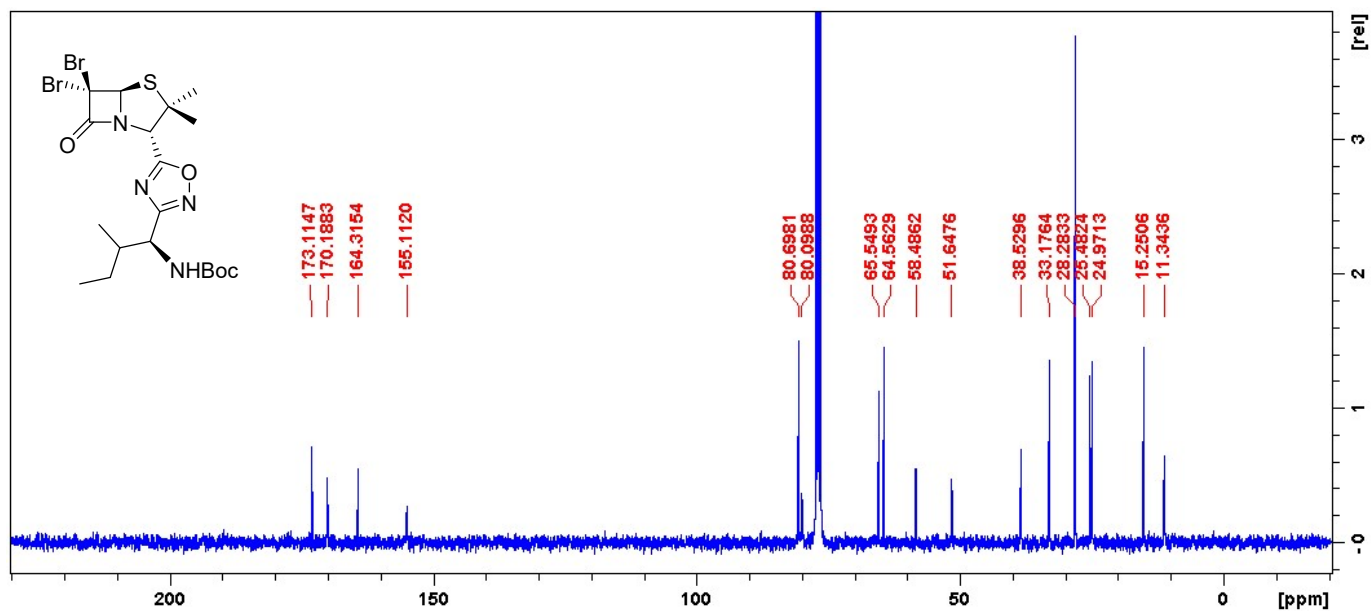

Figure S 25. <sup>13</sup>C NMR spectra of compound 22ae in CDCl<sub>3</sub>.

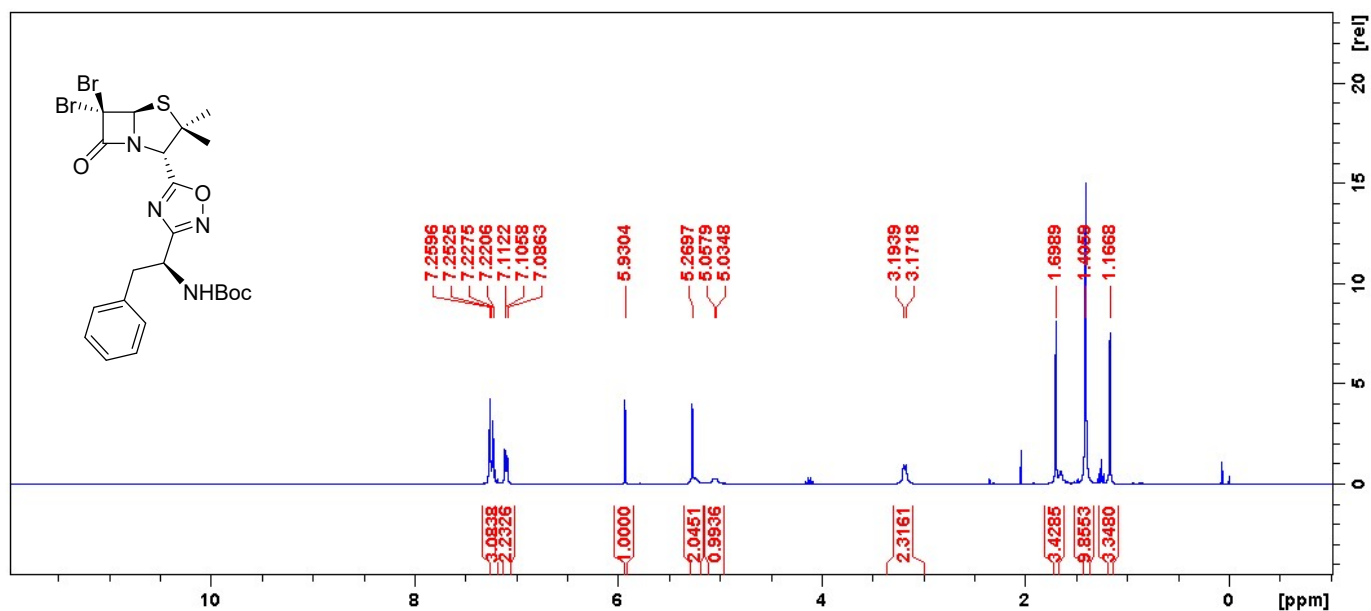

Figure S 26.  $^1\text{H}$  NMR spectra of compound 22af in  $\text{CDCl}_3$ .

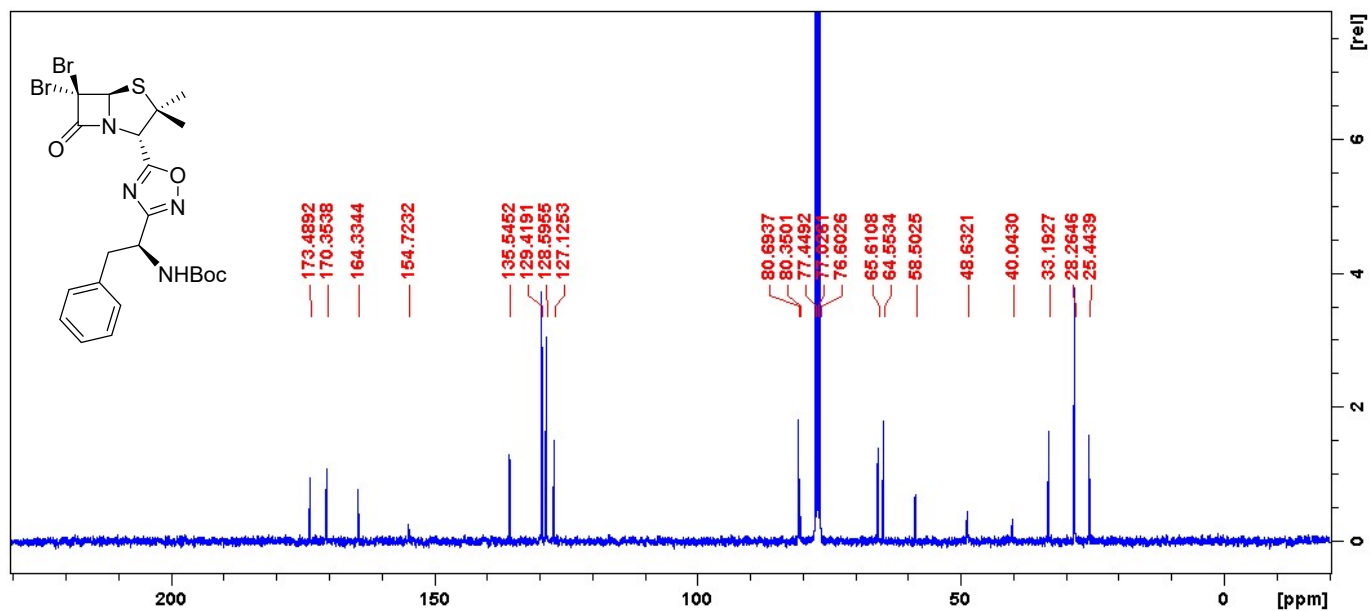

Figure S 26.  $^{13}\text{C}$  NMR spectra of compound 22af in  $\text{CDCl}_3$ .

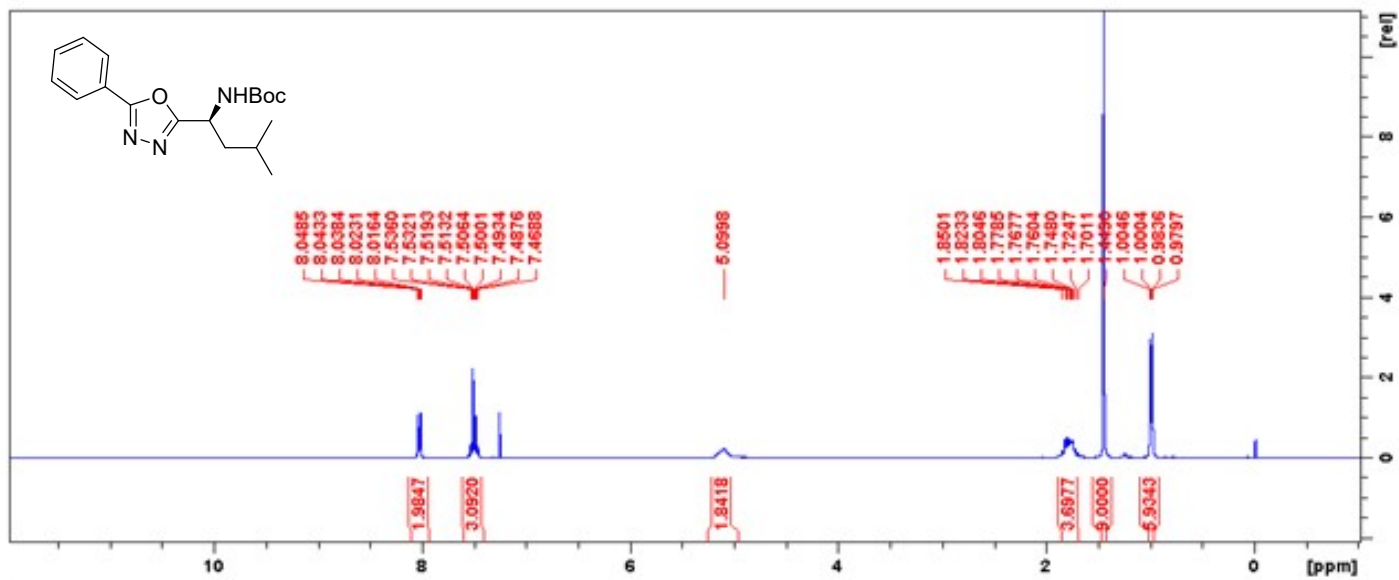

Figure S 27.  $^1\text{H}$  NMR spectra of compound 26ba in  $\text{CDCl}_3$ .

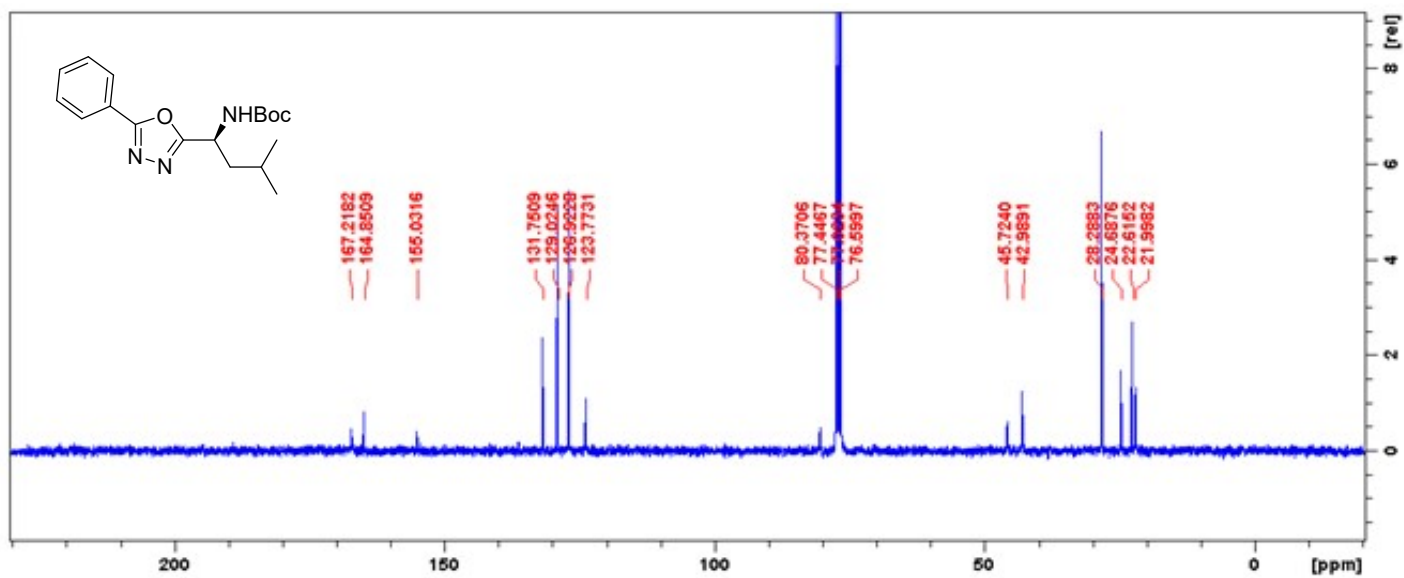

Figure S 27.  $^{13}\text{C}$  NMR spectra of compound 26ba in  $\text{CDCl}_3$ .

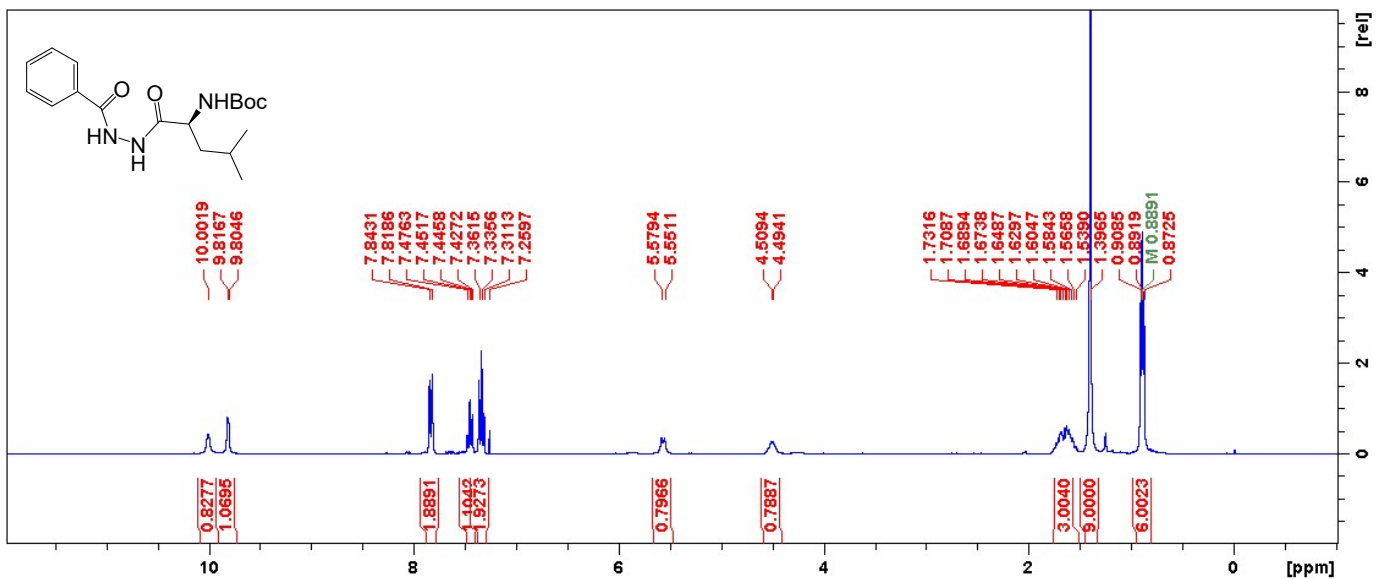

Figure S 28.  $^1\text{H}$  NMR spectra of compound 25ba in  $\text{CDCl}_3$ .

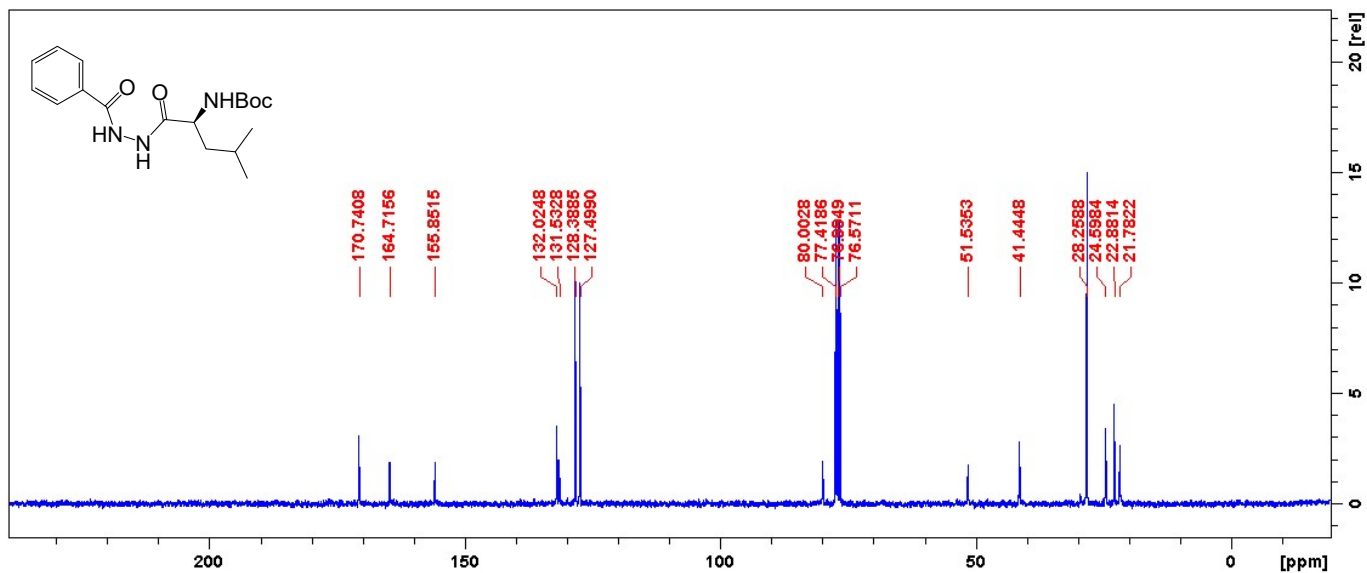

Figure S 28.  $^{13}\text{C}$  NMR spectra of compound 25ba in  $\text{CDCl}_3$ .

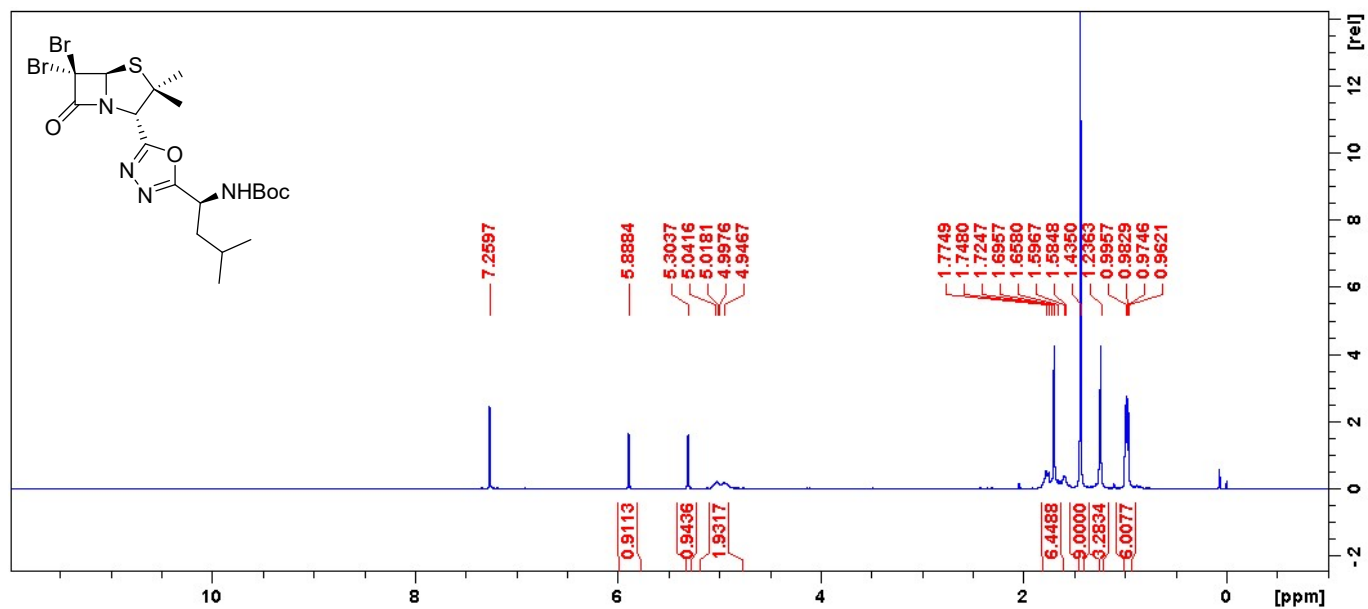

Figure S 29. <sup>1</sup>H NMR spectra of compound 26aa in CDCl<sub>3</sub>.

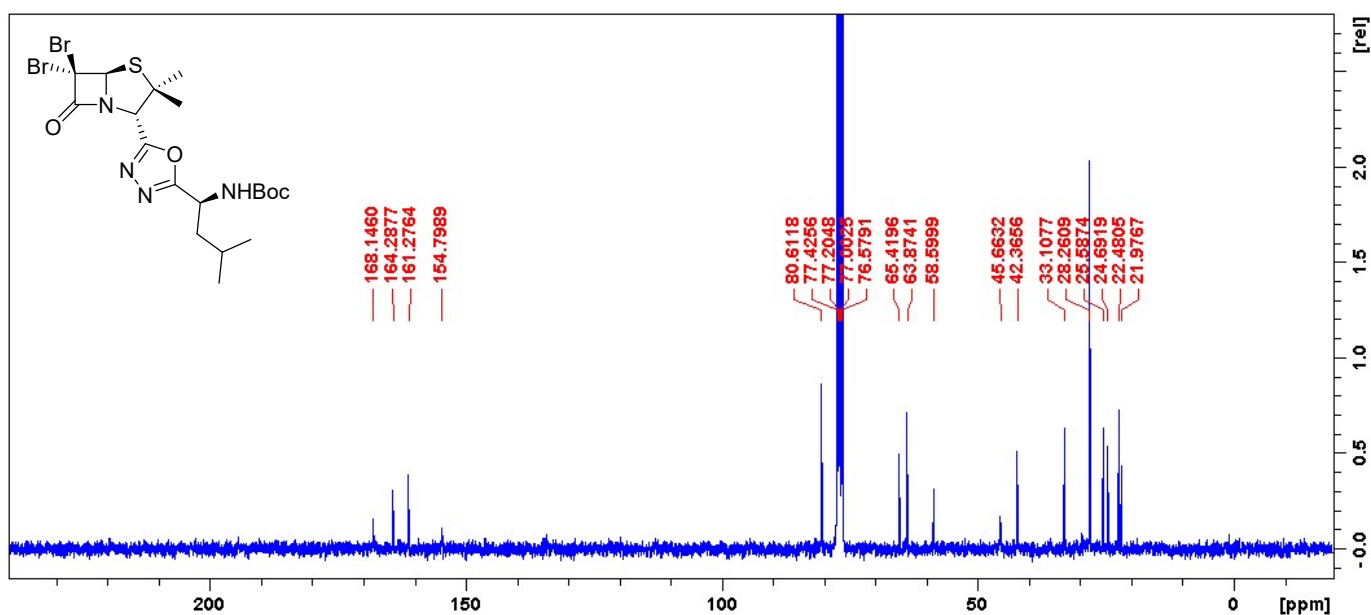

Figure S 29. <sup>13</sup>C NMR spectra of compound 26aa in CDCl<sub>3</sub>.

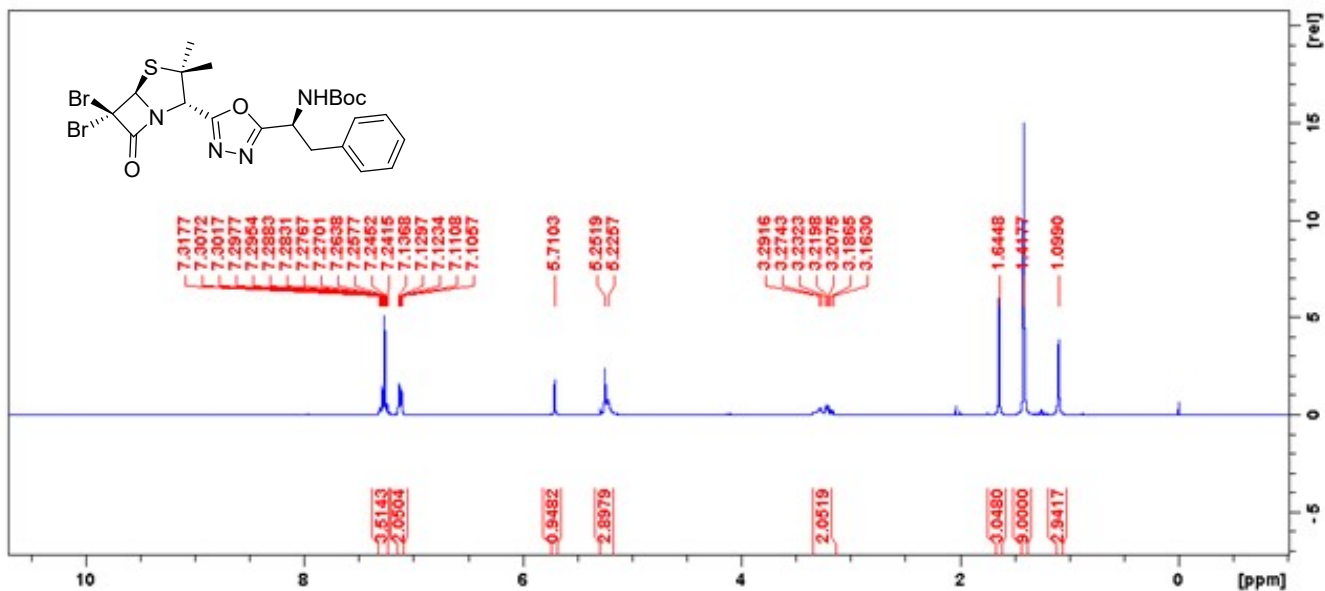

Figure S 30. <sup>1</sup>H NMR spectra of compound 26ab in in CDCl<sub>3</sub>.

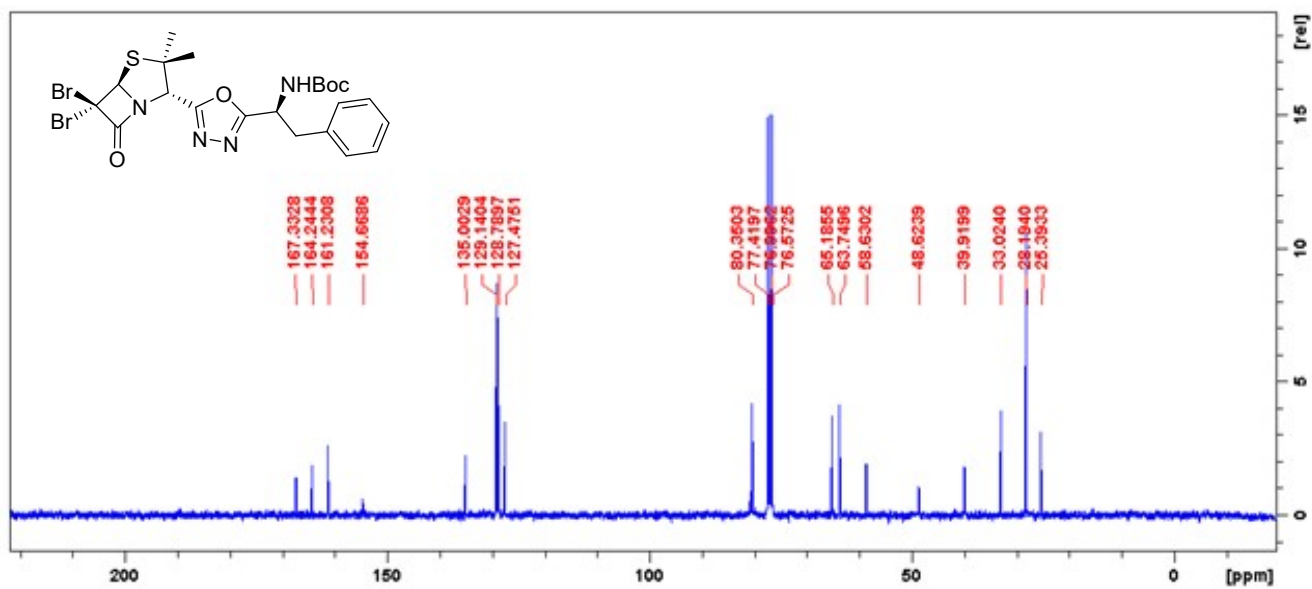

Figure S 30. <sup>13</sup>C NMR spectra of compound 26ab in in CDCl<sub>3</sub>.

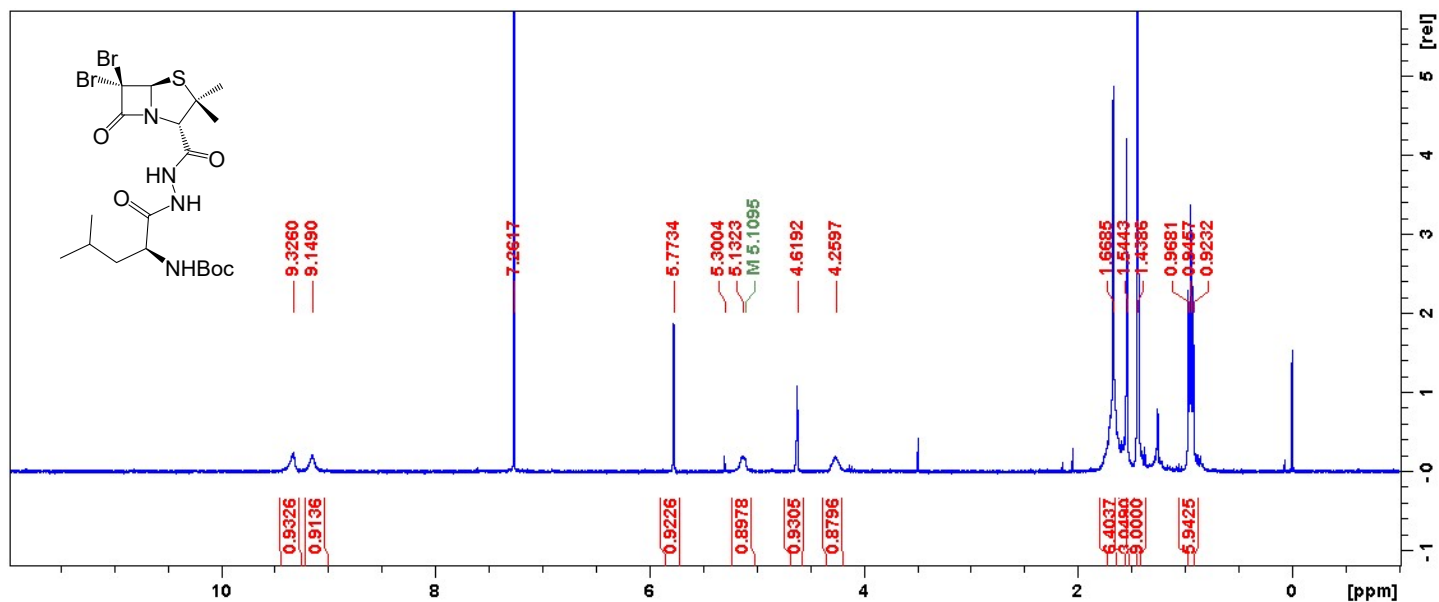

Figure S 31. <sup>1</sup>H NMR spectra of compound 25aa in CDCl<sub>3</sub>.

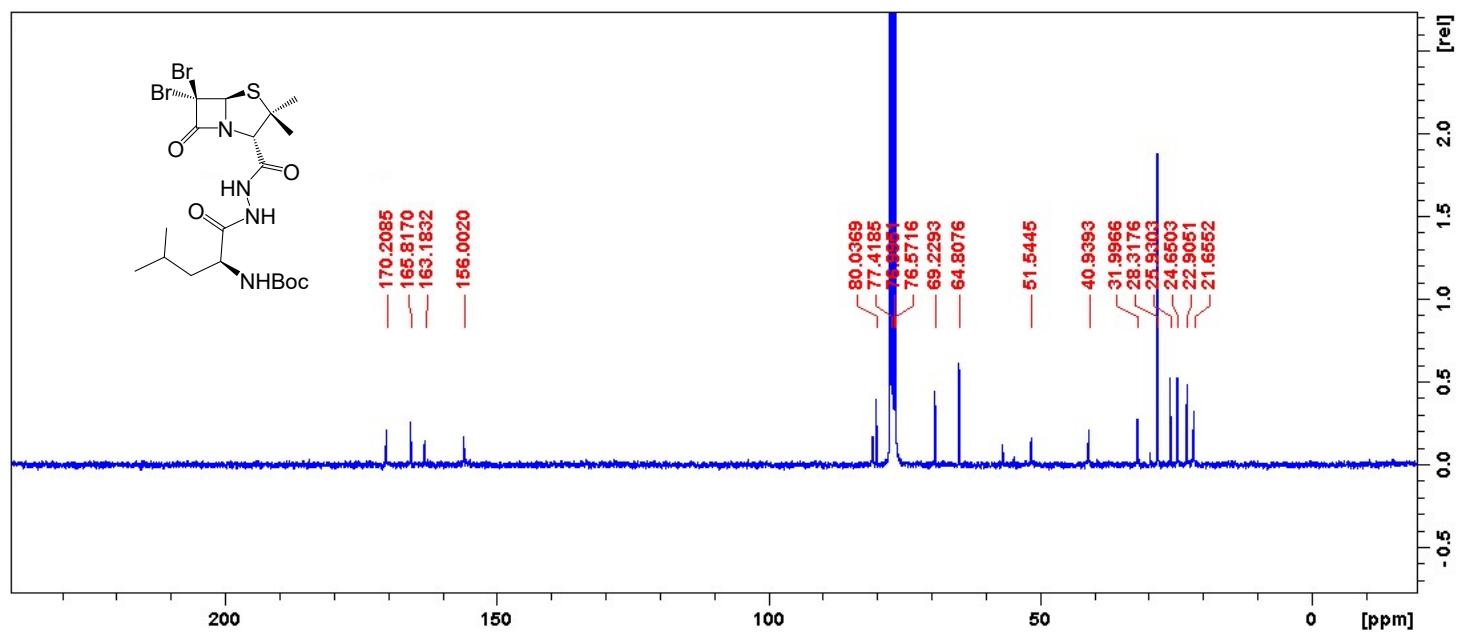

Figure S 31. <sup>13</sup>C NMR spectra of compound 25aa in CDCl<sub>3</sub>.



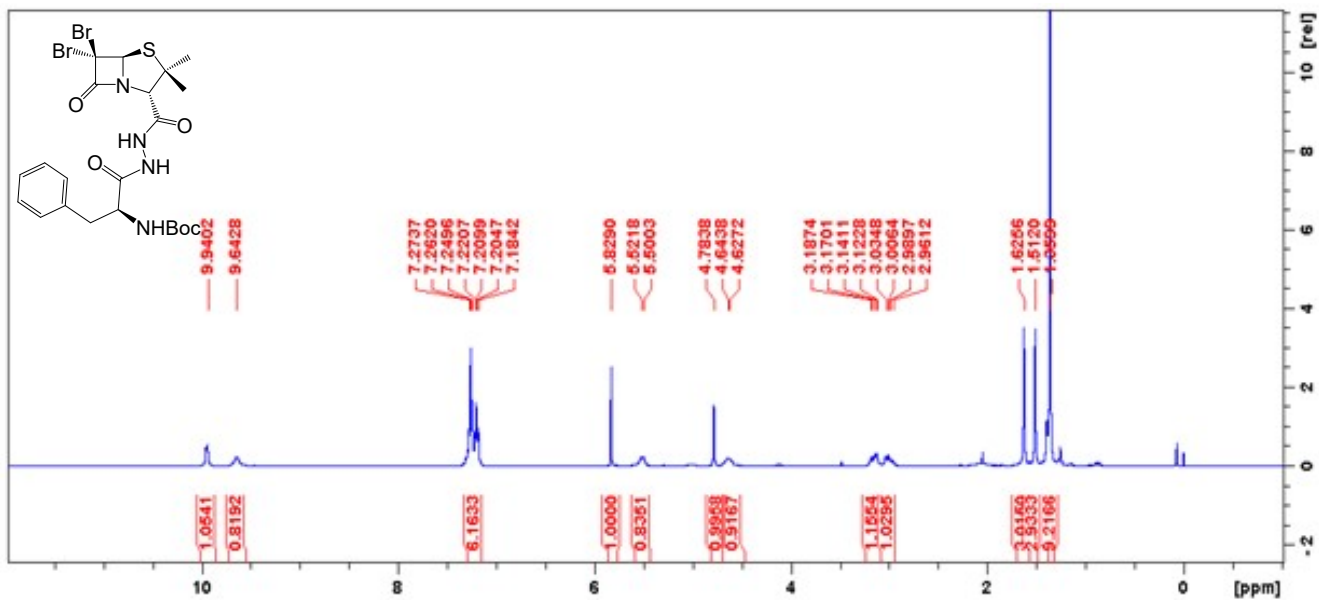

Figure S 32.  $^1\text{H}$  NMR spectra of compound 25ab in  $\text{CDCl}_3$ .

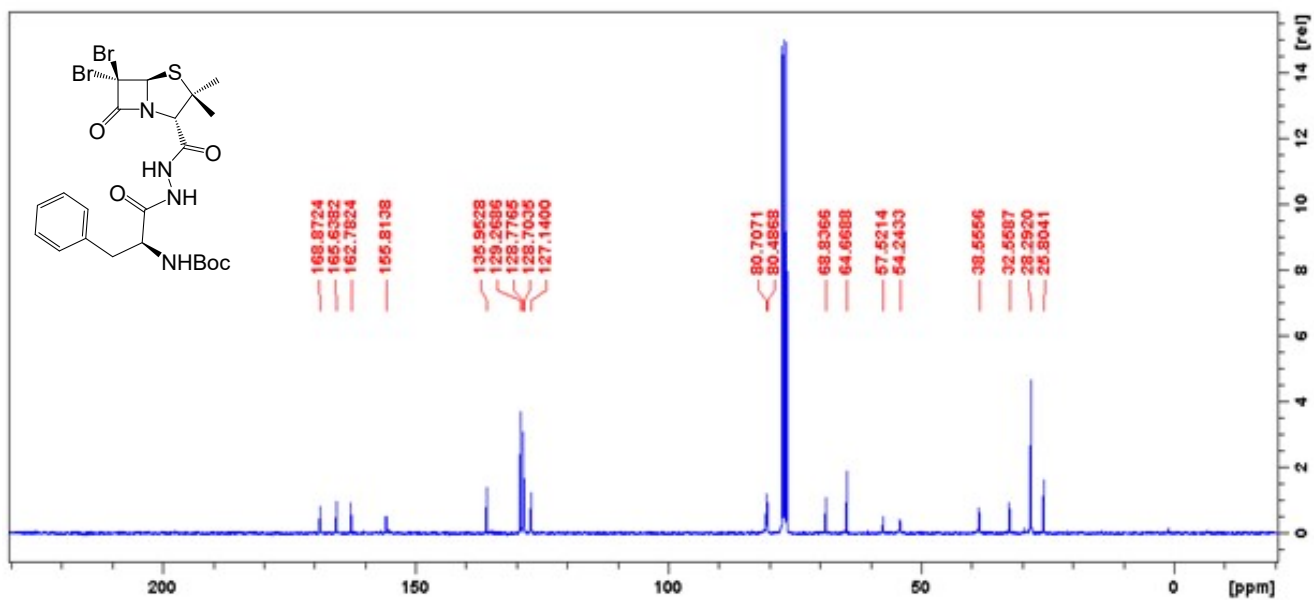

Figure S 32.  $^{13}\text{C}$  NMR spectra of compound 25ab in  $\text{CDCl}_3$ .

## 2. Variable temperature $^1\text{H}$ NMR experiment on compound **13ca**

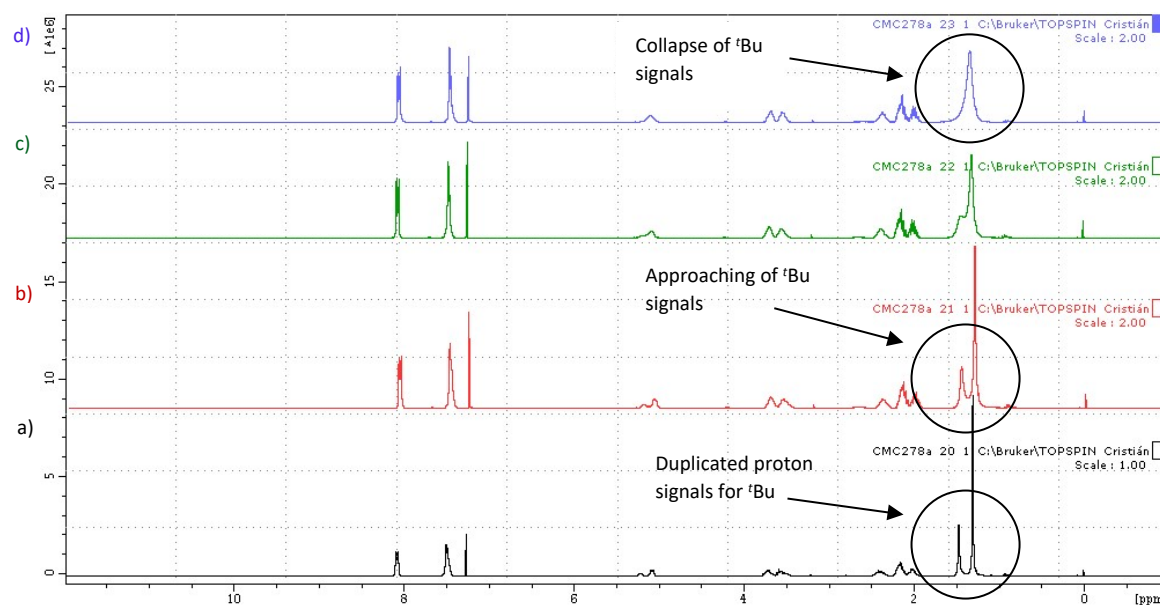

**Figure S 33.** Variable temperature  $^1\text{H}$  NMR experiment on compound **13ca**: a) at room temperature. b) at 35°C. c) at 45°C. d) at 55°C. The collapse of the duplicated proton signals corresponding to the *t*-butyl methyl groups is clearly appreciated when temperature rises from r.t. to 55°C.
